# Supplementary material for: Biological, Psychological, and Social Determinants of Depression: A Review of Recent Literature
Source: MDPI journal article supplement (doi:10.3390/brainsci11121633), 2021-12-10
Supplement: s1 [file s1]

**Table S1. Data charting table – a selection of determinants from the literature**

Each study contains a selection of determinants; related outcomes are provided.

| <b>Last name of first author and year</b> | <b>Title</b>                                                                                                                                                                           | <b>Determinant</b>                                                                               | <b>Outcome</b>      |
|-------------------------------------------|----------------------------------------------------------------------------------------------------------------------------------------------------------------------------------------|--------------------------------------------------------------------------------------------------|---------------------|
| Pullmer 2020                              | Cognitive and behavioral correlates of depressive symptoms in a community sample of adolescents                                                                                        | obsessive-compulsive symptoms, thought-action fusion, thought-shape fusion, and eating pathology | depressive symptoms |
| Houtepen 2020                             | Associations of adverse childhood experiences with educational attainment and adolescent health and the role of family and socioeconomic factors: A prospective cohort study in the UK | Adverse childhood experiences                                                                    | Depression          |
| Firth 2020                                | Food and mood: how do diet and nutrition affect mental wellbeing?                                                                                                                      | Food                                                                                             | Depression          |
| Bone 2020                                 | The role of gender inequalities in adolescent depression                                                                                                                               | Gender inequality                                                                                | Depression          |

|                |                                                                                                                                                         |                                                                                                           |                           |
|----------------|---------------------------------------------------------------------------------------------------------------------------------------------------------|-----------------------------------------------------------------------------------------------------------|---------------------------|
| Arnetz 2020    | Dysfunctional neuroplasticity in newly arrived Middle Eastern refugees in the U.S.: Association with environmental exposures and mental health symptoms | Neurotrophins combined into a neuroplasticity index                                                       | Depression                |
| Zhou 2019      | Who has low health literacy and does it matter for depression? Findings from aggregated and disaggregated racial/ethnic groups                          | Health literacy                                                                                           | Depression                |
| Zhao 2019      | Neuroimmune Advance in Depressive Disorder                                                                                                              | stress response, neuroendocrine, neurotransmission, neurogenesis, and gut microbiota, (neuro)inflammation | Major depressive disorder |
| Zhang 2019     | Association between fatigue and depressive symptoms among kidney transplantation recipients: The mediating role of rumination                           | Fatigue                                                                                                   | depressive symptoms       |
| Yamanishi 2019 | Interleukin-18-deficient mice develop hippocampal abnormalities related to possible depressive-like behaviors                                           | IL-18 and death of hippocampal cells                                                                      | depressive-like behaviour |

|                  |                                                                                                                                                               |                                                                                                                                                                      |                             |
|------------------|---------------------------------------------------------------------------------------------------------------------------------------------------------------|----------------------------------------------------------------------------------------------------------------------------------------------------------------------|-----------------------------|
| Ward 2019        | Relational impairments, sluggish cognitive tempo, and severe inattention are associated with elevated self-rated depressive symptoms in adolescents with ADHD | higher SCT symptom severity, lower hyperactive/impulsive (HI) symptom severity, higher social impairments, higher conflict with parents, and lower academic problems | depressive symptoms         |
| Wang 2019        | High urea induces depression and LTP impairment through mTOR signalling suppression caused by carbamylation                                                   | urea accumulation in brain                                                                                                                                           | Depression                  |
| Wang 2019        | Fr-HMGB1 and ds-HMGB1 activate the kynurenine pathway via different mechanisms in association with depressive-like behavior                                   | kynurenine pathway, different redox states of HMGB1                                                                                                                  | Depression                  |
| Van Dalfsen 2019 | The involvement of sleep in the relationship between the serotonin transporter gene-linked polymorphic region (5-HTTLPR) and depression: A systematic review  | serotonin transporter gene-linked polymorphic region (5-HTTLPR)                                                                                                      | (Stress-related) depression |

|                     |                                                                                                                                                                                   |                                                                                                              |                       |
|---------------------|-----------------------------------------------------------------------------------------------------------------------------------------------------------------------------------|--------------------------------------------------------------------------------------------------------------|-----------------------|
| Valles-Colomer 2019 | The neuroactive potential of the human gut microbiota in quality of life and depression                                                                                           | human gut microbiota                                                                                         | Depression            |
| Tsai 2019           | Ambivalence over emotional expression and intrusive thoughts as moderators of the link between self-stigma and depressive symptoms among Chinese American breast cancer survivors | Self-stigma                                                                                                  | Depression            |
| Trick 2019          | Perseverative negative thinking predicts depression in people with acute coronary syndrome                                                                                        | Perseverative negative thinking                                                                              | Depression            |
| Torres-Berrío 2019  | Unraveling the epigenetic landscape of depression: focus on early life stress                                                                                                     | Early life stress, epigenetics                                                                               | Depression            |
| Teshigawara 2019    | Changes in tryptophan metabolism during pregnancy and postpartum periods: Potential involvement in postpartum depressive symptoms                                                 | Tryptophan (TRP) metabolism, plasma levels of KYN and KA, and KYN/TRP and KA/KYN ratio, plasma level of 3HAA | Postpartum depression |
| Stower 2019         | Depression linked to the microbiome                                                                                                                                               | Microbiome and metabolic capabilities                                                                        | Depression            |

|             |                                                                                                                                                                                    |                                |                           |
|-------------|------------------------------------------------------------------------------------------------------------------------------------------------------------------------------------|--------------------------------|---------------------------|
| Speed 2019  | Investigating the causal relationship between neuroticism and depression via Mendelian randomization                                                                               | Neuroticism                    | Depression                |
| Song 2019   | Metabolomic signatures and microbial community profiling of depressive rat model induced by adrenocorticotrophic hormone                                                           | gut microbiota                 | depression                |
| Smeeth 2019 | Polygenic risk for circulating reproductive hormone levels and their influence on hippocampal volume and depression susceptibility                                                 | Reproductive hormones          | Major depressive disorder |
| Simkin 2019 | Microbiome and Mental Health, Specifically as It Relates to Adolescents                                                                                                            | microbiome, the gut-brain axis | depression                |
| Saul 2019   | Polymorphism in the serotonin transporter gene polymorphisms ( 5-HTTLPR) modifies the association between significant life events and depression in people with multiple sclerosis | Significant life events        | Depression                |

|              |                                                                                                                                                     |                                          |                                                                |
|--------------|-----------------------------------------------------------------------------------------------------------------------------------------------------|------------------------------------------|----------------------------------------------------------------|
| Sanders 2019 | A role for the microbiome in mother-infant interaction and perinatal depression                                                                     | maternal microbiota                      | Depression                                                     |
| Patel 2019   | Rodent models of social stress and neuronal plasticity: Relevance to depressive-like disorders                                                      | Social stress (rodents)                  | Depression                                                     |
| Park 2019    | Significant role of gene-gene interactions of clock genes in mood disorder                                                                          | Genes                                    | Mood disorder (major depressive disorder and bipolar disorder) |
| Orchard 2019 | I Am Worthless and Kind'; the specificity of positive and negative self-evaluation in adolescent depression                                         | Self-concept                             | Depression                                                     |
| Normann 2019 | Gene-environment interactions between HPA-axis genes and stressful life events in depression: a systematic review                                   | HPA-axis genes and stressful life events | Depression                                                     |
| Nissen 2019  | Low-level cognitive ability in young adulthood and other risk factors of depression in an observational cohort study among deployed Danish soldiers | cognitive ability                        | Depression                                                     |

|                 |                                                                                                                                                                    |                                                      |                           |
|-----------------|--------------------------------------------------------------------------------------------------------------------------------------------------------------------|------------------------------------------------------|---------------------------|
| Nankoo 2019     | Examining the Rate of Self-Reported ADHD-Related Traits and Endorsement of Depression, Anxiety, Stress, and Autistic-Like Traits in Australian University Students | ADHD-related symptoms                                | Depression                |
| Mutyambizi 2019 | Subjective social status and inequalities in depressive symptoms: a gender-specific decomposition analysis for South Africa                                        | Inequalities, social status                          | Depression                |
| Moulton 2019    | Depressive symptoms in inflammatory bowel disease: an extraintestinal manifestation of inflammation?                                                               | inflammation and dysregulation of the gut-brain axis | depressive symptoms       |
| Milenkovic 2019 | The Role of Chemokines in the Pathophysiology of Major Depressive Disorder                                                                                         | chemokines                                           | Major depressive disorder |
| Metel 2019      | Resilience and cognitive biases mediate the relationship between early exposure to traumatic life events and depressive symptoms in young adults                   | early exposure to traumatic life events              | depressive symptoms       |

|          |                                                                                                                                                   |                                                                                                                 |                           |
|----------|---------------------------------------------------------------------------------------------------------------------------------------------------|-----------------------------------------------------------------------------------------------------------------|---------------------------|
| Ma 2019  | Chronic paradoxical sleep deprivation-induced depression-like behavior, energy metabolism and microbial changes in rats                           | circadian disturbance, chronic PSD-induced alterations in gut microbiota and related host changes in metabolism | Depression-like behaviour |
| Lv 2019  | The Gut Microbiome Modulates the Changes in Liver Metabolism and in Inflammatory Processes in the Brain of Chronic Unpredictable Mild Stress Rats | dysbiosis gut microbiome                                                                                        | Depression                |
| Lu 2019  | Community-based structural social capital and depressive symptoms of older urban Chinese adults: The mediating role of cognitive social capital   | Structural social capital                                                                                       | depressive symptoms       |
| Liu 2019 | Prioritization and comprehensive analysis of genes related to major depressive disorder                                                           | genes                                                                                                           | Major depressive disorder |
| Liu 2019 | A Latent Structure Analysis of Cognitive Vulnerability to Depression in Adolescence                                                               | Cognitive vulnerability                                                                                         | Depression                |



|             |                                                                                                                                                   |                                      |                                |
|-------------|---------------------------------------------------------------------------------------------------------------------------------------------------|--------------------------------------|--------------------------------|
| Liang 2019  | Exploring causal pathways linking cerebral small vessel diseases burden to poststroke depressive symptoms with structural equation model analysis | Cerebral small vessel diseases (SVD) | Poststroke depressive symptoms |
| Li 2019     | Integrative analyses of major histocompatibility complex loci in the genome-wide association studies of major depressive disorder                 | Genes                                | Depression                     |
| Kuo 2019    | Moody microbiome: Challenges and chances                                                                                                          | Gut microbiota                       | Depression                     |
| Ksinan 2019 | Genetic and environmental effects on the development of depressive symptoms from adolescence to adulthood in a nationally representative sample   | Genetic and environmental effects    | depressive symptoms            |
| Kruse 2019  | Kynurenine metabolism and inflammation-induced depressed mood: A human experimental study                                                         | Kynurenine pathway                   | Depressed mood                 |

|                  |                                                                                                                   |                                                                                                                                                                                                                            |                                                     |
|------------------|-------------------------------------------------------------------------------------------------------------------|----------------------------------------------------------------------------------------------------------------------------------------------------------------------------------------------------------------------------|-----------------------------------------------------|
| Konsztowicz 2019 | The role of illness engulfment in the association between insight and depressive symptomatology in schizophrenia  | Insight                                                                                                                                                                                                                    | depressive symptoms                                 |
| Kong 2019        | The association of endocannabinoid receptor genes (CNR1 and CNR2) polymorphisms with depression: A meta-analysis  | Gene variants                                                                                                                                                                                                              | Depression susceptibility                           |
| Kojima 2019      | BDNF pro-peptide: physiological mechanisms and implications for depression                                        | BDNF pro-peptide                                                                                                                                                                                                           | Major depressive disorder                           |
| Khaled 2019      | Prevalence and potential determinants of subthreshold and major depression in the general population of Qatar     | Ethnicity, migrant status                                                                                                                                                                                                  | Major depressive disorder and subthreshold disorder |
| Kelly 2019       | Mood and Microbes: Gut to Brain Communication in Depression                                                       | Gut microbiota                                                                                                                                                                                                             | Depression                                          |
| Kahl 2019        | Link between depression and cardiovascular diseases due to epigenomics and proteomics: Focus on energy metabolism | Cardiovascular disease; lifestyle factors (e.g. physical activity, smoking behavior), dysfunctions of endocrine systems (e.g. hypothalamus-pituitary adrenal axis), and a dysbalance of pro- and anti-inflammatory factors | Depression                                          |

|               |                                                                                                                                                     |                                    |                                   |
|---------------|-----------------------------------------------------------------------------------------------------------------------------------------------------|------------------------------------|-----------------------------------|
| Jianguo 2019  | Altered gut metabolome contributes to depression-like behaviors in rats exposed to chronic unpredictable mild stress                                | gut metabolome, stress             | Depression-like behaviour         |
| Jia 2019      | Ciliary neurotrophic factor is a key sex-specific regulator of depressive-like behavior in mice                                                     | Ciliary neurotrophic factor (CNTF) | Depressive-like behaviour         |
| Jacobson 2019 | Glucocorticoid receptor deletion from locus coeruleus norepinephrine neurons promotes depression-like social withdrawal in female but not male mice | Glucocorticoid receptor deletion   | Depression-like social withdrawal |
| Inserra 2019  | Neuroimmunomodulation in Major Depressive Disorder: Focus on Caspase 1, Inducible Nitric Oxide Synthase, and Interferon-Gamma                       | Inflammation, stress               | Major depressive disorder         |
| Innes 2019    | Microglial-driven changes in synaptic plasticity: A possible role in major depressive disorder                                                      | Microglia                          | Major depressive disorder         |

|             |                                                                                                                                                                                              |                                 |                            |
|-------------|----------------------------------------------------------------------------------------------------------------------------------------------------------------------------------------------|---------------------------------|----------------------------|
| Hufner 2019 | How acute and chronic physical disease may influence mental health - An Analysis of neurotransmitter precursor amino acid levels                                                             | inflammatory reactions, PHE/TYR | Mental health-Depression   |
| Hu 2019     | Inflammation-dependent ISG15 upregulation mediates MIA-induced dendrite damages and depression by disrupting NEDD4/Rap2A signaling                                                           | * Maternal immune activation    | depression-like behaviors  |
| Holmes 2019 | Aberrant Epigenomic Modulation of Glucocorticoid Receptor Gene (NR3C1) in Early Life Stress and Major Depressive Disorder Correlation: Systematic Review and Quantitative Evidence Synthesis | Early life stress               | Major depressive disorder  |
| Hei 2019    | Effects of chronic mild stress induced depression on synaptic plasticity in mouse hippocampus                                                                                                | Chronic mild stress             | Depression-like behaviours |

|                 |                                                                                                                                                                                             |                                       |                                      |
|-----------------|---------------------------------------------------------------------------------------------------------------------------------------------------------------------------------------------|---------------------------------------|--------------------------------------|
| Halahakoon 2019 | Cognitive Impairment and Depression—Cause, Consequence, or Coincidence?                                                                                                                     | Cognitive impairment                  | Depression                           |
| Gong 2019       | Proteomic analysis of the intestine reveals SNARE-mediated immunoregulatory and amino acid absorption perturbations in a rat model of depression                                            | gut-brain axis                        | Depression                           |
| Gerring 2019    | A gene co-expression network-based analysis of multiple brain tissues reveals novel genes and molecular pathways underlying major depression                                                | genes and gene co-expression networks | Major depression                     |
| Gabrys 2019     | Self-Reported Mild Traumatic Brain Injuries in Relation to Rumination and Depressive Symptoms: Moderating Role of Sex Differences and a Brain-Derived Neurotrophic Factor Gene Polymorphism | Mild traumatic brain injuries         | depressive symptoms (and rumination) |

|              |                                                                                                                           |                                                                                                                                                     |                                |
|--------------|---------------------------------------------------------------------------------------------------------------------------|-----------------------------------------------------------------------------------------------------------------------------------------------------|--------------------------------|
| Frangou 2019 | Insulin resistance: Genetic associations with depression and cognition in population based cohorts                        | Insulin resistance traits                                                                                                                           | Depression                     |
| Fossati 2019 | Circuit based anti-correlation, attention orienting, and major depression                                                 | (Neural networks), social rejection                                                                                                                 | Depression                     |
| Fang 2019    | Do daily dynamics in rumination and affect predict depressive symptoms and trait rumination? An experience sampling study | Entropy                                                                                                                                             | Depressive symptoms            |
| Fabbri 2019  | The Genetics of Treatment-Resistant Depression: A Critical Review and Future Perspectives                                 | Variants in genes                                                                                                                                   | treatment-resistant depression |
| Elwood 2019  | A systematic review investigating if genetic or epigenetic markers are associated with postnatal depression               | interaction between epigenetic, genetic, hormonal and environmental factors (ex. genetic polymorphisms, stressful life events, childhood adversity) | Postnatal depression           |

|                |                                                                                                                                              |                                          |                                |
|----------------|----------------------------------------------------------------------------------------------------------------------------------------------|------------------------------------------|--------------------------------|
| Duan 2019      | The IDO genetic polymorphisms and postpartum depressive symptoms: an association study in Chinese parturients who underwent cesarean section | Genetic polymorphism, kynurenine pathway | Postpartum depressive symptoms |
| Druzhkova 2019 | Acute stress response to a cognitive task in patients with major depressive disorder: potential metabolic and proinflammatory biomarkers     | stress response                          | Major depressive disorder      |
| DeJong 2019    | Does rumination mediate the relationship between attentional control and symptoms of depression?                                             | Attentional control                      | Depression                     |
| Dam 2019       | Clinical association to FKBP5 rs1360780 in patients with depression                                                                          | genes                                    | Unipolar depression            |
| Chung 2019     | Exploration of microbiota targets for major depressive disorder and mood related traits                                                      | Microbiota                               | Major depressive disorder      |

|               |                                                                                                                                                                   |                              |                                                                                                                         |
|---------------|-------------------------------------------------------------------------------------------------------------------------------------------------------------------|------------------------------|-------------------------------------------------------------------------------------------------------------------------|
| Chen 2019     | The effects of glucocorticoids on depressive and anxiety-like behaviors, mineralocorticoid receptor-dependent cell proliferation regulates anxiety-like behaviors | chronic unpredictable stress | Depressive-like behaviour                                                                                               |
| Chen 2019     | Hippocampal Genetic Knockdown of PPAR $\delta$ Causes Depression-Like Behaviors and Neurogenesis Suppression                                                      | PPAR $\delta$                | Depressive-like behaviours                                                                                              |
| Carvalho 2019 | Cognitive fusion and depressive symptoms in women with chronic pain: A longitudinal growth curve modelling study over 12 months                                   | Cognitive fusion             | depressive symptoms                                                                                                     |
| Cadden 2018   | Cognitive Reserve Attenuates the Effect of Disability on Depression in Multiple Sclerosis                                                                         | Disability                   | Depression                                                                                                              |
| Border 2019   | No Support for Historical Candidate Gene or Candidate Gene-by-Interaction Hypotheses for Major Depression Across Multiple Large Samples                           | Genes                        | a number of operational definitions of depression used (e.g., lifetime diagnosis, current severity, episode recurrence) |



|                 |                                                                                                                                                                 |                                                        |                           |
|-----------------|-----------------------------------------------------------------------------------------------------------------------------------------------------------------|--------------------------------------------------------|---------------------------|
| Blote 2019      | The temporal association between emotional clarity and depression symptoms in adolescents                                                                       | emotional clarity                                      | Depression                |
| Bernstein 2019  | Unique and predictive relationships between components of cognitive vulnerability and symptoms of depression                                                    | cognitive vulnerability / style, attributions          | depressive symptoms       |
| Barone 2019     | The 'Yin' and the 'Yang' of the kynurenine pathway: excitotoxicity and neuroprotection imbalance in stress-induced disorders                                    | tryptophan/catabolites (TRY/CAT) pathway, inflammation | Major depressive disorder |
| Bailen 2019     | Meta-emotions in daily life: Associations with emotional awareness and depression                                                                               | Meta-emotional experience                              | Depression                |
| Aldoghachi 2019 | Screening of brain-derived neurotrophic factor (BDNF) single nucleotide polymorphisms and plasma BDNF levels among Malaysian major depressive disorder patients | BDNF allele                                            | Major depressive disorder |

|                |                                                                                                                                                         |                                            |                                       |
|----------------|---------------------------------------------------------------------------------------------------------------------------------------------------------|--------------------------------------------|---------------------------------------|
| Agnihotri 2019 | PINK1 deficiency is associated with increased deficits of adult hippocampal neurogenesis and lowers the threshold for stress-induced depression in mice | stress                                     | Stress-induced depression             |
| Zlata 2018     | Subjective Cognitive Decline Correlates With Depression Symptoms and Not With Concurrent Objective Cognition in a Clinic-Based Sample of Older Adults   | subjective cognitive decline               | depression                            |
| Zhao 2018      | BDNF Val66Met polymorphism, life stress and depression: A meta-analysis of gene-environment interaction                                                 | Stressful life events, childhood adversity | Depression                            |
| Zhang 2018     | CDK5-mediated phosphorylation of Sirt2 contributes to depressive-like behavior induced by social defeat stress                                          | Histone deacetylases                       | Depression, depressive-like behaviour |

|                    |                                                                                                                                               |                                                                                              |                           |
|--------------------|-----------------------------------------------------------------------------------------------------------------------------------------------|----------------------------------------------------------------------------------------------|---------------------------|
| Zhang 2018         | Dvl3 polymorphism interacts with life events and pro-inflammatory cytokines to influence major depressive disorder susceptibility             | Dvl3 allelic variations, negative life events, pro-inflammatory cytokines                    | Major depressive disorder |
| Zhang 2018         | Neuroimaging genomic studies in major depressive disorder: A systematic review                                                                | Genes                                                                                        | Major depressive disorder |
| Zang 2018          | Regulation of proinflammatory monocyte activation by the kynurenine-AhR axis underlies immunometabolic control of depressive behavior in mice | Kynurenine, inflammatory signalling                                                          | Depression                |
| Zamora-Racaza 2018 | Role of psychosocial reserve capacity in anxiety and depression in patients with systemic lupus erythematosus                                 | Low self-esteem, optimism, coping and social support                                         | Depression                |
| Zalar 2018         | The Role of Microbiota in Depression - a brief review                                                                                         | Microbiota                                                                                   | Depressive disorders      |
| Youssef 2018       | Association of BDNF Val66Met Polymorphism and Brain BDNF Levels with Major Depression and Suicide                                             | brain brain-derived neurotrophic factor and the brain-derived neurotrophic factor Met allele | Depression                |

|             |                                                                                                                                                                               |                                               |                           |
|-------------|-------------------------------------------------------------------------------------------------------------------------------------------------------------------------------|-----------------------------------------------|---------------------------|
| Yang 2018   | Quantitative proteomic study of the plasma reveals acute phase response and LXR/RXR and FXR/RXR activation in the chronic unpredictable mild stress mouse model of depression | chronic unpredictable mild stress, (proteins) | Depression                |
| Xiao 2018   | The Gene Encoding Protocadherin 9 (PCDH9), a Novel Risk Factor for Major Depressive Disorder                                                                                  | Genes                                         | Major depressive disorder |
| Wu 2018     | PI3K/AKT/GSK3 $\beta$ /CRMP-2-mediated neuroplasticity in depression induced by stress                                                                                        | Early stress, neuroinflammatory factors       | Depression                |
| Winter 2018 | Gut microbiome and depression: what we know and what we need to know                                                                                                          | Gut microbiome                                | Depression                |
| Wigner 2018 | Variation of genes encoding KAT1, AADAT and IDO1 as a potential risk of depression development                                                                                | Genes involved in TRYCATs pathway             | Depressive disorder       |
| Wigner 2018 | Association between single nucleotide polymorphisms of TPH1 and TPH2 genes, and depressive disorders                                                                          | Genes, polymorphisms                          | Depressive disorder       |

|             |                                                                                                                                                                      |                                                        |                     |
|-------------|----------------------------------------------------------------------------------------------------------------------------------------------------------------------|--------------------------------------------------------|---------------------|
| Wigner 2018 | Variation of genes involved in oxidative and nitrosative stresses in depression                                                                                      | Genes                                                  | Depression          |
| Wigner 2018 | The molecular aspects of oxidative & nitrosative stress and the tryptophan catabolites pathway (TRYCATs) as potential causes of depression                           | TRYCAT pathway, antioxidants, nitric oxide synthase    | Depression          |
| Wang 2018   | Interaction between early-life stress and FKBP5 gene variants in major depressive disorder and post-traumatic stress disorder: A systematic review and meta-analysis | Genotype, early life stress                            | Major depression    |
| Wang 2018   | Association study of NDST3 gene for schizophrenia, bipolar disorder, major depressive disorder in the Han Chinese population                                         | Gene                                                   | Depressive disorder |
| Uchida 2017 | Epigenetic mechanisms of major depression: Targeting neuronal plasticity                                                                                             | Genes, non-genetic factors (ex. stressful life events) | Depression          |

|               |                                                                                                                                                          |                                                                                                                                         |                           |
|---------------|----------------------------------------------------------------------------------------------------------------------------------------------------------|-----------------------------------------------------------------------------------------------------------------------------------------|---------------------------|
| Trindade 2018 | Chronic illness-related cognitive fusion explains the impact of body dissatisfaction and shame on depression symptoms in breast cancer patients          | body image dissatisfaction and chronic illness shame                                                                                    | depressive symptoms       |
| Tozzi 2018    | Epigenetic Changes of FKBP5 as a Link Connecting Genetic and Environmental Risk Factors with Structural and Functional Brain Changes in Major Depression | Genes, childhood maltreatment                                                                                                           | Major depressive disorder |
| Smith 2018    | Cognitive biases predict symptoms of depression, anxiety and wellbeing above and beyond neuroticism in adolescence                                       | Rumination, dysfunctional attitudes, and negative biases in ambiguous scenarios interpretation and self-referential memory, neuroticism | Depression                |
| Shimada 2018  | An epigenome-wide methylation study of healthy individuals with or without depressive symptoms                                                           | DNA methylation                                                                                                                         | Depression                |
| Senra 2018    | Exploring the link between perfectionism and depressive symptoms: Contribution of rumination and defense styles                                          | maladaptive perfectionism                                                                                                               | Depression                |

|                     |                                                                                                                        |                                                                                                                                                               |                           |
|---------------------|------------------------------------------------------------------------------------------------------------------------|---------------------------------------------------------------------------------------------------------------------------------------------------------------|---------------------------|
| Schachter 2018      | Effects of obesity on depression: A role for inflammation and the gut microbiota                                       | obesity                                                                                                                                                       | depression                |
| Rantanen 2018       | Awareness of hypertension and depressive symptoms: a cross-sectional study in a primary care population                | gender, alcohol use, smoking status, physical activity                                                                                                        | depressive symptoms       |
| Quinn 2018          | Negative cognitive style and cortisol recovery accentuate the relationship between life stress and depressive symptoms | Negative cognitive style, cortisol recovery, stressful life events                                                                                            | Symptoms of depression    |
| Prussien 2018       | Cognitive Function, Coping, and Depressive Symptoms in Children and Adolescents with Sickle Cell Disease               | Cognitive function, coping                                                                                                                                    | depressive symptoms       |
| Porras-Segovia 2018 | Prevalence and correlates of major depression in Granada, Spain: Results from the GranadΣp study                       | Gender, family history of mental illness, neuroticism, number of life threatening events (LTE), physical health status, cognitive impairment and cannabis use | Major depressive disorder |
| Perin 2018          | Amyloid burden and incident depressive symptoms in preclinical Alzheimer's disease                                     | amyloid burden                                                                                                                                                | Depressive symptoms       |

|              |                                                                                                                                                                                                                        |                             |                          |
|--------------|------------------------------------------------------------------------------------------------------------------------------------------------------------------------------------------------------------------------|-----------------------------|--------------------------|
| Park 2018    | Trauma and Depression among North Korean Refugees: The Mediating Effect of Negative Cognition                                                                                                                          | early traumatic experiences | depressive symptoms      |
| Otani 2018   | Interrelations among negative core beliefs, attachment anxiety and low self-directedness, putative central constructs of depression vulnerabilities in cognitive, attachment and psychobiological personality theories | Negative self-image         | Depression vulnerability |
| Orchard 2018 | The combined influence of cognitions in adolescent depression: Biases of interpretation, self-evaluation, and memory                                                                                                   | cognitive biases            | depression               |
| Noda 2018    | Impaired neuroplasticity in the prefrontal cortex in depression indexed through paired associative stimulation                                                                                                         | neuroplasticity             | depression               |



|                |                                                                                                                                                    |                                                |                           |
|----------------|----------------------------------------------------------------------------------------------------------------------------------------------------|------------------------------------------------|---------------------------|
| Naoi 2018      | Type A monoamine oxidase and serotonin are coordinately involved in depressive disorders: from neurotransmitter imbalance to impaired neurogenesis | MAOA, serotonin, gene-environment interactions | Depressive behaviours     |
| Nagy 2018      | A role for activity-dependent epigenetics in the development and treatment of major depressive disorder                                            | stress, epigenetic factors                     | major depressive disorder |
| Mundorf 2018   | Methylation of MORC1: A possible biomarker for depression?                                                                                         | gene                                           | major depression          |
| Mekli 2018     | Genome-wide scan of depressive symptomatology in two representative cohorts in the United States and the United Kingdom                            | Genes                                          | Depression                |
| McCormick 2018 | Socioeconomic Predictors of Incident Depression in Systemic Lupus Erythematosus                                                                    | socioeconomic predictors                       | Depression                |

|                           |                                                                                                                                                                     |                                                                  |                              |
|---------------------------|---------------------------------------------------------------------------------------------------------------------------------------------------------------------|------------------------------------------------------------------|------------------------------|
| Mac<br>Giollabhui<br>2018 | Negative cognitive style<br>interacts with negative<br>life events to predict first<br>onset of a major<br>depressive episode in<br>adolescence via<br>hopelessness | hopelessness,<br>(negative inferential<br>style)                 | depression                   |
| Liu 2018                  | Beta-defensin 1, aryl<br>hydrocarbon receptor<br>and plasma kynurenine in<br>major depressive<br>disorder: metabolomics-<br>informed genomics                       | Kynurenine, genes                                                | Major depressive<br>disorder |
| Lima-Ojeda<br>2018        | Neurobiology of<br>depression: A<br>neurodevelopmental<br>approach                                                                                                  | genes, (early stress),<br>BDNF, HPA axis, brain<br>abnormalities | depression                   |
| Lam 2018                  | DNA methylation and<br>genetic variation of the<br>angiotensin converting<br>enzyme (ACE) in<br>depression                                                          | ACE methylation                                                  | depression                   |
| Lam 2018                  | Genotype-dependent<br>associations between<br>serotonin transporter<br>gene (SLC6A4) DNA<br>methylation and late-life<br>depression                                 | methylation                                                      | late-life depression         |

|                 |                                                                                                                                                        |                                                                          |                      |
|-----------------|--------------------------------------------------------------------------------------------------------------------------------------------------------|--------------------------------------------------------------------------|----------------------|
| Kushner 2018    | Depression in early adolescence: Contributions from relational aggression and variation in the oxytocin receptor gene                                  | genes, interpersonal risk factors                                        | depression           |
| Kube 2018       | Integrating situation-specific dysfunctional expectations and dispositional optimism into the cognitive model of depression - A path-analytic approach | Dysfunctional expectations                                               | Major depression     |
| Kube 2018       | Situational expectations mediate the effect of global beliefs on depressive symptoms: a 1-year prospective study using a student sample                | global beliefs (such as intermediate beliefs and dispositional optimism) | depressive symptoms  |
| Kitzlerová 2018 | Interactions Among Polymorphisms of Susceptibility Loci for Alzheimer's Disease or Depressive Disorder                                                 | polymorphisms                                                            | Major depression     |
| Kang 2018       | Longitudinal associations between glucocorticoid receptor methylation and late-life depression                                                         | methylation of genes                                                     | late-life depression |

|               |                                                                                                                                                                                                  |                                                                                                      |                           |
|---------------|--------------------------------------------------------------------------------------------------------------------------------------------------------------------------------------------------|------------------------------------------------------------------------------------------------------|---------------------------|
| Jesulola 2018 | Understanding the pathophysiology of depression: From monoamines to the neurogenesis hypothesis model - are we there yet?                                                                        | neurotransmitter, genetic, environmental, immunologic, endocrine factors, and neurogenesis, HPA axis | depression                |
| Huang 2018    | Neural circuitry among connecting the hippocampus, prefrontal cortex and basolateral amygdala in a mouse depression model: Associations correlations between BDNF levels and BOLD - fMRI signals | (BDNF), chronic unpredictable mild stress                                                            | Depression-like behaviour |
| Hu 2018       | No association of GRIN2A polymorphisms with the major depressive disorder in the Chinese Han origin                                                                                              | polymorphisms (genetics)                                                                             | Major depressive disorder |
| Hing 2018     | A comprehensive review of genetic and epigenetic mechanisms that regulate BDNF expression and function with relevance to major depressive disorder                                               | BDNF, stress                                                                                         | MDD                       |

|                |                                                                                                                                              |                                                                                       |                     |
|----------------|----------------------------------------------------------------------------------------------------------------------------------------------|---------------------------------------------------------------------------------------|---------------------|
| He 2018        | Interaction between job stress and the BDNF Val66Met polymorphism affects depressive symptoms in Chinese healthcare workers                  | Job-related stress, BDNF polymorphism                                                 | Depression          |
| Haverkamp 2018 | Differences in the association of inflammation and tryptophan with depressive symptoms between white and non-white chronic dialysis patients | Inflammation, tryptophan                                                              | Depressive symptoms |
| Hankin 2018    | Cognitive and Interpersonal Vulnerabilities to Adolescent Depression: Classification of Risk Profiles for a Personalized Prevention Approach | cognitive vulnerability, interpersonal support, and interpersonal conflict            | Depression          |
| Hallgren 2018  | Passive and mentally-active sedentary behaviors and incident major depressive disorder: A 13-year cohort study                               | passive (e.g. watching TV) and mentally-active (e.g. office-work) sedentary behaviour | Depression          |

|                |                                                                                                                                                |                                                                |                     |
|----------------|------------------------------------------------------------------------------------------------------------------------------------------------|----------------------------------------------------------------|---------------------|
| Guida 2018     | Antibiotic-induced microbiota perturbation causes gut endocannabinoidome changes, hippocampal neuroglial reorganization and depression in mice | Microbiome, antibiotic                                         | Depression          |
| Geisler 2018   | Immunometabolism in the Pathogenesis of Depressive Disorders - Therapeutic Considerations                                                      | genetics, environment, lifestyle, immunological status         | Depression          |
| Gariballa 2018 | Association between muscle function, cognitive state, depression symptoms and quality of life of older people: evidence from clinical practice | low muscle function/strength                                   | Depression symptoms |
| Garcia 2018    | Brooding as moderator of depressive symptoms after a work accident: A longitudinal study                                                       | Work accident                                                  | depressive symptoms |
| Enko 2018      | Assessment of tryptophan metabolism and signs of depression in individuals with carbohydrate malabsorption                                     | lactose malabsorption, fructose malabsorption, TRP metabolites | depression          |

|                   |                                                                                                                                                       |                                                                                                 |                        |
|-------------------|-------------------------------------------------------------------------------------------------------------------------------------------------------|-------------------------------------------------------------------------------------------------|------------------------|
| Duan 2018         | The role of tryptophan metabolism in postpartum depression                                                                                            | tryptophan metabolism, kynurenine pathway products                                              | post-partum depression |
| Denis 2018        | Cognitive factors and post-partum depression: What is the influence of general personality traits, rumination, maternal self-esteem, and alexithymia? | cognitive factors (neuroticism, brooding rumination, and low maternal self-esteem, alexithymia) | post-partum depression |
| da Conceição 2018 | Implication of galanin gene rs948854 polymorphism in depressive symptoms in adolescents                                                               | alleles, genotypes                                                                              | depressive symptoms    |
| Christensen 2018  | Young adult cognitive ability and subsequent major depression in a cohort of 666,804 Danish men                                                       | young adult cognitive ability                                                                   | major depression       |
| Burke 2018        | Latent classes of trait affect and cognitive affective regulation strategies are associated with depression, non-suicidal self-injury, and well-being | Coping                                                                                          | Depressive symptoms    |

|                    |                                                                                                                                                                              |                                                           |                              |
|--------------------|------------------------------------------------------------------------------------------------------------------------------------------------------------------------------|-----------------------------------------------------------|------------------------------|
| Brouillard<br>2018 | Links Between the<br>Mother-Adolescent and<br>Father-Adolescent<br>Relationships and<br>Adolescent Depression: A<br>Genetically Informed<br>Study                            | Support and conflict,<br>genetic vulnerability            | depressive<br>symptoms       |
| Bondar 2018        | Molecular Adaptations to<br>Social Defeat Stress and<br>Induced Depression in<br>Mice                                                                                        | social defeat stress,<br>(genes)                          | depression                   |
| Boku 2018          | Neural basis of major<br>depressive disorder:<br>Beyond monoamine<br>hypothesis                                                                                              | hippocampus, HPA<br>axis, glucocorticoids,<br>(monoamine) | Major depressive<br>disorder |
| Bleys 2018         | Gene-environment<br>interactions between<br>stress and 5-HTTLPR in<br>depression: A meta-<br>analytic update                                                                 | stress, 5-HTTLPR                                          | depression                   |
| Backhouse<br>2018  | Cognitive ability,<br>education and<br>socioeconomic status in<br>childhood and risk of<br>post-stroke depression in<br>later life: A systematic<br>review and meta-analysis | education                                                 | post-stroke<br>depression    |



|               |                                                                                                                                                                                                                                                           |                                                                                                                                                                                                                                                                       |                           |
|---------------|-----------------------------------------------------------------------------------------------------------------------------------------------------------------------------------------------------------------------------------------------------------|-----------------------------------------------------------------------------------------------------------------------------------------------------------------------------------------------------------------------------------------------------------------------|---------------------------|
| Ashokan 2018  | Housing environment influences stress-related hippocampal substrates and depression-like behavior                                                                                                                                                         | Impoverished/enriched sensory environments; stress and sensory enrichment                                                                                                                                                                                             | Depressive-like behaviour |
| Arcego 2018   | Impact of High-Fat Diet and Early Stress on Depressive-Like Behavior and Hippocampal Plasticity in Adult Male Rats                                                                                                                                        | High fat diet, early stress (social isolation)                                                                                                                                                                                                                        | Depressive-like behaviour |
| Anderson 2018 | Linking the biological underpinnings of depression: Role of mitochondria interactions with melatonin, inflammation, sirtuins, tryptophan catabolites, DNA repair and oxidative and nitrosative stress, with consequences for classification and cognition | immune-inflammation, tryptophan catabolites (TRYCATs), mitochondrial dysfunction, aryl hydrocarbon receptor activation, and oxidative and nitrosative stress (O&NS), as well as decreased sirtuins and melatonergic pathway activity, prenatal stress, gut-brain axis | Major depressive disorder |
| Zhou 2017     | Life events and hopelessness depression: The influence of affective experience                                                                                                                                                                            | Affective experience (of life events); negative, positive, neutral life events, negative cognitive style                                                                                                                                                              | Hopelessness depression   |

|            |                                                                                                                                                             |                                                                                                                                           |                           |
|------------|-------------------------------------------------------------------------------------------------------------------------------------------------------------|-------------------------------------------------------------------------------------------------------------------------------------------|---------------------------|
| Zhang 2017 | Interaction of estrogen receptor $\beta$ and negative life events in susceptibility to major depressive disorder in a Chinese Han female population         | Estrogen receptor $\beta$ (ESR2), (negative life events)                                                                                  | Major depressive disorder |
| Yohn 2017  | The role of 5-HT receptors in depression                                                                                                                    | serotonin                                                                                                                                 | depression                |
| Yang 2017  | Lucky gene 5-HTTLPR and postpartum depression: A systematic review                                                                                          | gene 5-HTTLPR                                                                                                                             | Postpartum depression     |
| Yang 2017  | Bifidobacterium in the gut microbiota confer resilience to chronic social defeat stress in mice                                                             | gut microbiota                                                                                                                            | depression                |
| Yang 2017  | The relationship between cognition and depressive symptoms, and factors modifying this association, in Alzheimer's disease: A multivariate multilevel model | cognition , family status, employment before retirement, homemaking, reading, aluminum utensil use, dietary restriction, and hypertension | depression                |

|                 |                                                                                                                                                     |                                                                                                                                                                                                                                                                                                             |                           |
|-----------------|-----------------------------------------------------------------------------------------------------------------------------------------------------|-------------------------------------------------------------------------------------------------------------------------------------------------------------------------------------------------------------------------------------------------------------------------------------------------------------|---------------------------|
| Xu 2017         | The interaction of miR-34b/c polymorphisms and negative life events increases susceptibility to major depressive disorder in Han Chinese population | miR-34b/c polymorphisms, (negative life events)                                                                                                                                                                                                                                                             | major depressive disorder |
| Wigner 2017     | Oxidative and Nitrosative Stress as Well as the Tryptophan Catabolites Pathway in Depressive Disorders                                              | oxidative and nitrosative stress, tryptophan catabolites pathway, nitric oxide synthase, genetic factors, monoaminergic factors, hormonal regulation disorders, biological rhythm sleep-wake, neuropeptides, immune factors, structural changes in central nervous system, various diseases and medications | depressive disorders      |
| Vermeer 2017    | Correlates of depressive symptoms in individuals attending outpatient stroke clinics                                                                | cognitive deficits, pain, tobacco use, being enrolled in therapy                                                                                                                                                                                                                                            | depressive symptoms       |
| Van Assche 2017 | Gene-based interaction analysis shows GABAergic genes interacting with parenting in adolescent depressive symptoms                                  | perceived parental support, psychological control, and harsh punishment, genes                                                                                                                                                                                                                              | depressive symptoms       |

|                |                                                                                                                             |                                                                            |                           |
|----------------|-----------------------------------------------------------------------------------------------------------------------------|----------------------------------------------------------------------------|---------------------------|
| Trindade 2017  | An 18-month study of the effects of IBD symptomatology and emotion regulation on depressed mood                             | IBD, emotion regulation processes (brooding, cognitive fusion, rumination) | Depressed mood            |
| Treutlein 2017 | Association between neuropeptide Y receptor Y2 promoter variant rs6857715 and major depressive disorder                     | NPY2R rs6857715 C-allele                                                   | major depressive disorder |
| Swartz 2017    | An epigenetic mechanism links socioeconomic status to changes in depression-related brain function in high-risk adolescents | SES, (HPA axis, methylation, amygdala) risk-related brain function,        | depressive symptoms       |
| Strasser 2017  | Mechanisms of Inflammation-Associated Depression: Immune Influences on Tryptophan and Phenylalanine Metabolisms             | immune system, tryptophan metabolism, tryptophan metabolism, IDO-1         | depression                |
| Strachan 2017  | Neighborhood deprivation and depression in adult twins: genetics and gene×environment interaction                           | Neighbourhood deprivation, (genes)                                         | Depression                |

|                |                                                                                                                                                                              |                                          |                                |
|----------------|------------------------------------------------------------------------------------------------------------------------------------------------------------------------------|------------------------------------------|--------------------------------|
| Stange 2017    | Perseverate or decenter?<br>Differential effects of metacognition on the relationship between parasympathetic inflexibility and symptoms of depression in a multi-wave study | parasympathetic inflexibility            | Symptoms of depression         |
| Slykerman 2017 | Antibiotics in the first year of life and subsequent neurocognitive outcomes                                                                                                 | antibiotics                              | depression symptoms            |
| Shi 2017       | Methylation Status of the Serotonin Transporter Promoter CpG Island Is Associated With Major Depressive Disorder in Chinese Han Population: A Case-Control Study             | serotonin transporter (5-HTT), education | major depressive disorder      |
| Serafini 2017  | Abnormalities in Kynurenine Pathway Metabolism in Treatment-Resistant Depression and Suicidality: A Systematic Review                                                        | Kynurenine pathway, neuroinflammation    | treatment-resistant depression |

|              |                                                                                                                               |                                                                |                                 |
|--------------|-------------------------------------------------------------------------------------------------------------------------------|----------------------------------------------------------------|---------------------------------|
| Savitz 2017  | Role of Kynurenine Metabolism Pathway Activation in Major Depressive Disorders                                                | kynurenine pathway, neurotoxic and neuroprotective metabolites | depression (depressive illness) |
| Rudzki 2017  | Immune suppression of IgG response against dairy proteins in major depression                                                 | IgG response to dairy proteins, TNF- $\alpha$ , cortisol       | depression                      |
| Rudolph 2017 | Cognition-emotion interaction as a predictor of adolescent depressive symptoms                                                | cognitive control (CC)                                         | depressive symptoms             |
| Roy 2017     | Identification of MicroRNA-124-3p as a Putative Epigenetic Signature of Major Depressive Disorder                             | microRNAs (miRNAs)                                             | major depressive disorder       |
| Qiao 2017    | Role of proBDNF and BDNF in dendritic spine plasticity and depressive-like behaviors induced by an animal model of depression | BDNF and proBDNF, chronic unpredicted mild stress              | major depressive disorder       |
| Platt 2017   | A review of cognitive biases in youth depression: attention, interpretation and memory                                        | cognitive biases, attention and interpretation biases          | youth depression                |

|                 |                                                                                                                                                                                                                              |                                                                                                          |                     |
|-----------------|------------------------------------------------------------------------------------------------------------------------------------------------------------------------------------------------------------------------------|----------------------------------------------------------------------------------------------------------|---------------------|
| Petkus 2017     | Gene-environment interplay in depressive symptoms: moderation by age, sex, and physical illness                                                                                                                              | genetics, physical illness, environmental influences                                                     | depressive symptoms |
| Pereira 2017    | Secondary to excessive melatonin synthesis, the consumption of tryptophan from outside the blood-brain barrier and melatonin over-signaling in the pars tuberalis may be central to the pathophysiology of winter depression | serotonin production and central hypothyroidism, melatonin production, circulating melatonin, tryptophan | winter depression   |
| Pariante 2017   | Why are depressed patients inflamed? A reflection on 20 years of research on depression, glucocorticoid resistance and inflammation                                                                                          | inflammation, HPA axis, early life trauma, maternal depression, infection, autoimmune disorder, genes    | major depression    |
| Normansell 2017 | Negative interpretation bias as a mechanism of the relationship between rejection sensitivity and depressive symptoms                                                                                                        | negative cognitive/interpretation biases                                                                 | depressive symptoms |

|                |                                                                                                                                                  |                                                    |                                     |
|----------------|--------------------------------------------------------------------------------------------------------------------------------------------------|----------------------------------------------------|-------------------------------------|
| Michalek 2017  | Genetic predisposition to advanced biological ageing increases risk for childhood-onset recurrent major depressive disorder in a large UK sample | genetic predisposition to shorter telomere lengths | recurrent major depressive disorder |
| Macrynika 2017 | Positive future-oriented fantasies and depressive symptoms: Indirect relationship through brooding                                               | fantasy engagement                                 | depressive symptoms                 |
| Ma 2017        | GNB3 and CREB1 gene polymorphisms combined with negative life events increase susceptibility to major depression in a Chinese Han population     | genetic factors, (negative life events)            | major depression                    |
| Liu 2017       | The Role of Neural Plasticity in Depression: From Hippocampus to Prefrontal Cortex                                                               | neural plasticity, (stress, negative stimuli)      | depression                          |
| Kvæl 2017      | Associations between physical function and depression in nursing home residents with mild and moderate dementia: a cross-sectional study         | muscle strength, balance, walking speed            | depressive symptoms                 |



|               |                                                                                                                                 |                                                       |                     |
|---------------|---------------------------------------------------------------------------------------------------------------------------------|-------------------------------------------------------|---------------------|
| Kuhlmann 2017 | Serum brain-derived neurotrophic factor and depressive symptoms in coronary heart disease patients: Role of cognitive functions | BDNF                                                  | depressive symptoms |
| Krzak 2017    | Does neurogenesis relate to depression and do antidepressants affect neurogenesis?                                              | Brain mechanisms                                      | depression          |
| Kraus 2017    | Serotonin and neuroplasticity - Links between molecular, functional and structural pathophysiology in depression                | (Serotonin), neuroplasticity                          | Depression          |
| Koopman 2017  | Depressed gut? The microbiota-diet-inflammation triad in depression                                                             | gut microbiota, early life trauma, diet, inflammation | depression          |
| Knyazev 2017  | Suppression mediates the effect of 5-HTTLPR by stress interaction on depression                                                 | stress, (genetics, emotion regulation)                | depression          |

|                |                                                                                                                                                                      |                                                              |                           |
|----------------|----------------------------------------------------------------------------------------------------------------------------------------------------------------------|--------------------------------------------------------------|---------------------------|
| Kim 2017       | The Impacts of Social Support and Cognitive Function on Depression among Community-Dwelling Older Japanese Americans                                                 | social support, cognitive function, and socioeconomic status | depression                |
| Jeon 2017      | Inflammation-induced depression: Its pathophysiology and therapeutic implications                                                                                    | kynurenine pathway, (tryptophan, serotonin, inflammation)    | depression                |
| Haverkamp 2017 | The role of tryptophan degradation in the association between inflammatory markers and depressive symptoms in chronic dialysis patients                              | inflammatory markers, (kynurenine pathway, KYN/TRP ratio)    | depressive symptoms       |
| Han 2017       | Interactions between the vascular endothelial growth factor gene polymorphism and life events in susceptibility to major depressive disorder in a Chinese population | genetics, (negative life events)                             | major depressive disorder |

|               |                                                                                                                                           |                                            |                      |
|---------------|-------------------------------------------------------------------------------------------------------------------------------------------|--------------------------------------------|----------------------|
| Gulyaeva 2017 | Interplay between Brain BDNF and Glutamatergic Systems: A Brief State of the Evidence and Association with the Pathogenesis of Depression | glutamatergic and BDNF systems             | depressive disorders |
| Gardiner 2017 | Large normal-range TBP and ATXN7 CAG repeat lengths are associated with increased lifetime risk of depression                             | genetic polymorphisms                      | lifetime depression  |
| Fuhr 2017     | Attachment, dysfunctional attitudes, self-esteem, and association to depressive symptoms in patients with mood disorders                  | attachment style                           | depressive symptoms  |
| Everaert 2017 | Individual differences in cognitive control over emotional material modulate cognitive biases linked to depressive symptoms               | negative attention bias, cognitive control | depressive symptoms  |
| Everaert 2017 | Mapping the interplay among cognitive biases, emotion regulation, and depressive symptoms                                                 | Cognitive biases and emotion regulation    | depressive symptoms  |

|                  |                                                                                                                               |                                                                                                                                                                |                           |
|------------------|-------------------------------------------------------------------------------------------------------------------------------|----------------------------------------------------------------------------------------------------------------------------------------------------------------|---------------------------|
| De Oliveira 2017 | Social Determinants of Depression Among Hispanic Women                                                                        | social determinants (education, health status, living with partner, [living with children, income, acculturation, health insurance status, employment status]) | depression                |
| Dantzer 2017     | Role of the Kynurenine Metabolism Pathway in Inflammation-Induced Depression: Preclinical Approaches                          | kynurenine metabolism pathway, inflammation                                                                                                                    | depression                |
| Connolly 2017    | Rumination interacts with life stress to predict depressive symptoms: An ecological momentary assessment study                | stress, rumination                                                                                                                                             | depressive symptoms       |
| Cissé 2017       | Depressive-like behavior is elevated among offspring of parents exposed to dim light at night prior to mating                 | artificial nighttime lighting - light at night                                                                                                                 | Depressive-like behaviour |
| Chen 2017        | Conscientiousness Moderates the Relationship Between Perceived Stress and Depressive Symptoms Among U.S. Chinese Older Adults | perceived stress                                                                                                                                               | depressive symptoms       |

|             |                                                                                                                                                                      |                                    |                           |
|-------------|----------------------------------------------------------------------------------------------------------------------------------------------------------------------|------------------------------------|---------------------------|
| Caputi 2017 | Do Feelings of Loneliness Mediate the Relationship between Sociocognitive Understanding and Depressive Symptoms During Late Childhood and Early Adolescence?         | sociocognitive understanding       | depression                |
| Brown 2017  | Social determinants of depression and suicidal behaviour in the Caribbean: a systematic review                                                                       | social inequalities / determinants | depression                |
| Zhu 2020    | Depressive-like behaviors are induced by chronic liver injury in male and female mice                                                                                | Chronic liver injury               | Depressive-like behaviour |
| Zhong 2020  | Epigenetic Modifications of GABAergic Interneurons Contribute to Deficits in Adult Hippocampus Neurogenesis and Depression-Like Behavior in Prenatally Stressed Mice | Prenatal stress                    | Depression phenotype      |

|                   |                                                                                                                                                               |                           |                     |
|-------------------|---------------------------------------------------------------------------------------------------------------------------------------------------------------|---------------------------|---------------------|
| Zhang 2020        | The Association between Dietary Patterns and Depressive Symptoms in Chinese Adults                                                                            | eating patterns           | depressive symptoms |
| Zajęczkowska 2020 | Polymorphism and expression of the Dvl3 gene in the etiology of depressive disorder                                                                           | Dvl3 gene                 | depressive disorder |
| Yu 2020           | Prenatal ethanol exposure enhances the susceptibility to depressive behavior of adult offspring rats fed a high-fat diet by affecting BDNF-associated pathway | prenatal ethanol exposure | depression          |
| Wright 2020       | New-onset depression among children, adolescents, and adults with hidradenitis suppurativa                                                                    | hidradenitis suppurativa  | depression          |
| Winding 2020      | Is bullying in adolescence associated with the development of depressive symptoms in adulthood?: A longitudinal cohort study                                  | bullying                  | depressive symptoms |
| Wellman 2020      | Secondhand Smoke Exposure and Depressive Symptoms in Children: A Longitudinal Study                                                                           | secondhand smoke          | depressive symptoms |

|           |                                                                                                                                                                          |                                                                                   |                                                      |
|-----------|--------------------------------------------------------------------------------------------------------------------------------------------------------------------------|-----------------------------------------------------------------------------------|------------------------------------------------------|
| Wang 2020 | Meta-analysis of 5-hydroxytryptamine transporter gene promoter region polymorphism and post-stroke depression                                                            | 5-hydroxytryptamine transporter gene promoter region (5-HTTLPR) gene polymorphism | post-stroke depression                               |
| Wang 2020 | Gene–disease association study of tumor necrosis factor- $\alpha$ G-308A gene polymorphism with risk of major depressive disorder: A systematic review and meta-analysis | TNF- $\alpha$ G-308A gene polymorphism                                            | poststroke, late-life, maternal, or major depression |
| Wang 2020 | Integrating genome-wide association study and expression quantitative trait loci data identifies NEGR1 as a causal risk gene of major depression disorder                | SNP                                                                               | Major depressive disorder                            |
| Wang 2020 | Advance in relationship between receptor gene abnormality and depression                                                                                                 | genes                                                                             | depression                                           |

|             |                                                                                                                                                                       |                              |                           |
|-------------|-----------------------------------------------------------------------------------------------------------------------------------------------------------------------|------------------------------|---------------------------|
| Wang 2020   | Variants in the upstream region of the insulin receptor substrate-1 gene is associated with major depressive disorder in the han chinese population                   | susceptible gene             | major depressive disorder |
| Walker 2020 | Acute exposure to low-level light at night is sufficient to induce neurological changes and depressive-like behavior                                                  | light at night (LAN)         | depressive-like responses |
| Tonon 2020  | How do stress, sleep quality, and chronotype associate with clinically significant depressive symptoms? A study of young male military recruits in compulsory service | stress, sleep, evening types | depressive symptoms       |
| Tomita 2020 | Spatial clustering of food insecurity and its association with depression: a geospatial analysis of nationally representative South African data, 2008-2015           | food insecurity              | depression                |



|                   |                                                                                                                                    |                                               |                           |
|-------------------|------------------------------------------------------------------------------------------------------------------------------------|-----------------------------------------------|---------------------------|
| Sunley 2020       | Ethnic and sex differences in the association of child maltreatment and depressed mood. The HELIUS study                           | emotional neglect, psychological abuse        | depressed mood            |
| Sparling 2020     | Depression among women of reproductive age in rural Bangladesh is linked to food security, diets and nutrition                     | food security, diets and nutrition            | depression                |
| Sharma 2020       | Association of placental tissue estrogen receptor alpha gene expression with postpartum depression in women at risk: A pilot study | ESR $\alpha$ gene                             | postpartum depression     |
| Schnittker 2020   | In-utero determinants of adult depression: evidence from the 1918 flu pandemic                                                     | gestational exposure to the 1918 flu pandemic | adult depression          |
| Schiweck 2020     | Childhood trauma, suicide risk and inflammatory phenotypes of depression: insights from monocyte gene expression                   | early stressors                               | depression                |
| Sahasrabudhe 2020 | Serum Vitamin D and Depressive Symptomatology among Boston-Area Puerto Ricans                                                      | serum 25(OH)D                                 | depressive symptomatology |

|                       |                                                                                                                                               |                                         |                     |
|-----------------------|-----------------------------------------------------------------------------------------------------------------------------------------------|-----------------------------------------|---------------------|
| Roomaney 2020         | Biopsychosocial predictors of symptoms of depression in a sample of South African women diagnosed with endometriosis                          | biopsychosocial predictors              | depression symptoms |
| Rivet-Noor            | The Role of Gut Mucins in the Etiology of Depression                                                                                          | stress, microbiome                      | depression          |
| Rathbun 2020          | Association between disease progression and depression onset in persons with radiographic knee osteoarthritis                                 | Osteoarthritis (OA) disease progression | depression          |
| Ramirez-Carrillo 2020 | Disturbance in human gut microbiota networks by parasites and its implications in the incidence of depression                                 | parasites/ microbiome                   | depression          |
| Quinn 2020            | Trying again (and again): Weight cycling and depressive symptoms in U.S. adults                                                               | weight cycling                          | depressive symptoms |
| Powell 2020           | What explains the link between childhood ADHD and adolescent depression? Investigating the role of peer relationships and academic attainment | childhood ADHD                          | depression          |

|                |                                                                                                                                                                  |                              |                     |
|----------------|------------------------------------------------------------------------------------------------------------------------------------------------------------------|------------------------------|---------------------|
| Nishida 2020   | Post-weaning folate deficiency induces a depression-like state via neuronal immaturity of the dentate gyrus in mice                                              | folate deficiency            | depressive symptoms |
| Mulugeta 2020  | Relationship between Serum 25(OH)D and Depression: Causal Evidence from a Bi-Directional Mendelian Randomization Study                                           | vitamin D                    | depression risk     |
| Moustafa 2020  | Depression Following Major Life Transitions in Women: A Review and Theory                                                                                        | life transitions             | depression          |
| Min 2020       | The Impact of Spouse's Illness on Depressive Symptoms: The Roles of Spousal Caregiving and Marital Satisfaction                                                  | chronic illness              | depression          |
| Millender 2020 | Associations between social determinants of health, perceived discrimination, and body mass index on symptoms of depression among young african american mothers | elevated BMI, discrimination | depression symptoms |

|               |                                                                                                                                                                                                              |                                                                                                                                                                                                                           |                        |
|---------------|--------------------------------------------------------------------------------------------------------------------------------------------------------------------------------------------------------------|---------------------------------------------------------------------------------------------------------------------------------------------------------------------------------------------------------------------------|------------------------|
| Meyer 2020    | Length Polymorphisms in the Angiotensin I-Converting Enzyme Gene and the Serotonin-Transporter-Linked Polymorphic Region Constitute a Risk Haplotype for Depression in Patients with Coronary Artery Disease | genetic variation                                                                                                                                                                                                         | depressive symptoms    |
| Medeiros 2020 | Post-stroke depression: A 2020 updated review                                                                                                                                                                | female sex, history of psychiatric illness, large or multiple strokes, injuries in frontal/anterior areas or in the basal ganglia, stroke occurrence within the past year, poor social support, and pronounced disability | post-stroke depression |
| Manczak 2020  | Water contaminant levels interact with parenting environment to predict development of depressive symptoms in adolescents                                                                                    | drinking water contaminants                                                                                                                                                                                               | depression             |
| Madison 2020  | Endotoxemia coupled with heightened inflammation predicts future depressive symptoms                                                                                                                         | endotoxemia, systematic inflammation                                                                                                                                                                                      | depressive symptoms    |

|          |                                                                                                                                                           |                              |                                  |
|----------|-----------------------------------------------------------------------------------------------------------------------------------------------------------|------------------------------|----------------------------------|
| Liu 2020 | The BDNF-FoxO1 Axis in the medial prefrontal cortex modulates depressive-like behaviors induced by chronic unpredictable stress in postpartum female mice | chronic unpredictable stress | depression-associated behaviours |
| Lin 2020 | Is trade a blessing or a curse? A panel data analysis of the determinants of depressive disorders                                                         | international trade          | depressive disorders             |
| Li 2020  | Association between dietary protein intake and the risk of depressive symptoms in adults                                                                  | protein intake               | depressive symptoms              |
| Li 2020  | Regulatory mechanisms of major depressive disorder risk variants                                                                                          | genetic variants             | MDD risk                         |
| Li 2020  | Linking childhood emotional abuse and adult depressive symptoms: The role of mentalizing incapacity                                                       | emotional abuse              | depressive symptoms              |

|              |                                                                                                                                                                                                        |                                                                           |                        |
|--------------|--------------------------------------------------------------------------------------------------------------------------------------------------------------------------------------------------------|---------------------------------------------------------------------------|------------------------|
| Li 2020      | Association between obstructive sleep apnea and risk of post-stroke depression: A hospital-based study in ischemic stroke patients                                                                     | obstructive sleep apnea                                                   | post-stroke depression |
| Leonard 2020 | Postpartum Perceived Stress Explains the Association between Perceived Social Support and Depressive Symptoms                                                                                          | social support, stress                                                    | depressive symptoms    |
| Lee 2020     | Comparison of prevalence and associated factors of depressive disorder between patients with head and neck cancer and those with lung cancer at a tertiary hospital in Taiwan: a cross-sectional study | self-harm history, educational level, stressor severity, anxiety severity | depression             |
| Lansner 2020 | Development of depression in patients with oral cavity cancer: a systematic review                                                                                                                     | treated for cancer                                                        | depressive symptoms    |
| Kubacka 2020 | Kynurenine pathway: The link between depressive disorders and inflammation                                                                                                                             | kynurenine pathway                                                        | depressive disorders   |

|               |                                                                                                                                    |                |                       |
|---------------|------------------------------------------------------------------------------------------------------------------------------------|----------------|-----------------------|
| Koskinen 2020 | From stress to depression: development of extracellular matrix-dependent cognitive impairment following social stress              | stress         | depressive-like state |
| Koga 2020     | Elder Abuse and Depressive Symptoms: Which is Cause and Effect? Bidirectional Longitudinal Studies From the JAGES                  | abuse          | depression            |
| Kobezak 2020  | Prospective associations between social anxiety and depression in youth: The moderating role of maternal major depressive disorder | social anxiety | depressive symptoms   |
| Klimova 2020  | The Impact of Nutrition and Intestinal Microbiome on Elderly Depression-A Systematic Review                                        | nutrition      | depressive symptoms   |

|            |                                                                                                                                                                                                |                                                                              |                       |
|------------|------------------------------------------------------------------------------------------------------------------------------------------------------------------------------------------------|------------------------------------------------------------------------------|-----------------------|
| Kim 2020   | The combined effect of socioeconomic status and metabolic syndrome on depression: the Korean National Health and Nutrition Examination Survey (KNHANES)                                        | SES, metabolic syndrome                                                      | depression            |
| Kautz 2020 | Longitudinal changes of inflammatory biomarkers moderate the relationship between recent stressful life events and prospective symptoms of depression in a diverse sample of urban adolescents | Recent stressful life events                                                 | Depressive symptoms   |
| Karl 2020  | Precarious working conditions and psychosocial work stress act as a risk factor for symptoms of postpartum depression during maternity leave: results from a longitudinal cohort study         | work-privacy conflict, low reward at work, and precarious working conditions | postpartum depression |



|             |                                                                                                                                                                                                |                                                |                       |
|-------------|------------------------------------------------------------------------------------------------------------------------------------------------------------------------------------------------|------------------------------------------------|-----------------------|
| Johar 2020  | Evaluation of antenatal risk factors for postpartum depression: a secondary cohort analysis of the cluster-randomised GeliS trial                                                              | antenatal risk factors                         | postpartum depression |
| Hunt 2020   | Effect of immune activation on the kynurenine pathway and depression symptoms - A systematic review and meta-analysis                                                                          | immune-activating agents                       | depression            |
| Hughes 2020 | A possible mechanism underlying mood disorders associated with LUTS: Chronic bladder outlet obstruction causes NLRP3-dependent inflammation in the hippocampus and depressive behavior in rats | bladder outlet obstruction (BOO)               | depressive behaviour  |
| Ho 2020     | Factors associated with depression in people with epilepsy: a retrospective case-control analysis                                                                                              | Female sex, refractoriness, and clonazepam use | depression            |

|                      |                                                                                                                                                              |                                                        |                       |
|----------------------|--------------------------------------------------------------------------------------------------------------------------------------------------------------|--------------------------------------------------------|-----------------------|
| Hayashi 2020         | Factors associated with symptoms of depression among pregnant women with gestational diabetes mellitus in Japan                                              | diet                                                   | depression symptoms   |
| Hashimoto 2020       | Early life stress from allergic dermatitis causes depressive-like behaviors in adolescent male mice through neuroinflammatory priming                        | early life stress from allergic dermatitis             | depressive behaviours |
| Haleem 2020          | Glucocorticoids in the Physiological and Transcriptional Regulation of 5-HT1A Receptor and the Pathogenesis of Depression                                    | 5-HT1A receptors, glucocorticoids, among other factors | depression            |
| Gutiérrez-Zotes 2020 | Interaction between the functional SNP rs2070951 in NR3C2 gene and high levels of plasma corticotropin-releasing hormone associates to postpartum depression | genotypes                                              | postpartum depression |

|             |                                                                                                                                                                     |                                                                                                              |                      |
|-------------|---------------------------------------------------------------------------------------------------------------------------------------------------------------------|--------------------------------------------------------------------------------------------------------------|----------------------|
| Flouri 2020 | Prenatal and childhood adverse life events, inflammation and depressive symptoms across adolescence                                                                 | psychosocial stressors                                                                                       | depressive symptoms  |
| Fang 2020   | Cerebral Small-Vessel Disease and Risk of Incidence of Depression: A Meta-Analysis of Longitudinal Cohort Studies                                                   | Cerebral small-vessel disease features                                                                       | depression           |
| Dong 2020   | Prevalence of Depressive Symptoms and Associated Factors among Internal Migrants with Tuberculosis: A Cross-Sectional Study in China                                | female gender, lower education, family dysfunction, poor doctor-patient communication, and TB-related stigma | depressive symptoms  |
| Didone 2020 | Factors associated with depressive symptoms in older adults in context of social vulnerability                                                                      | Quality of life and social support, malnutrition, living alone, reporting pain and being female              | depressive symptoms  |
| Dadi 2020   | Causal mechanisms of postnatal depression among women in Gondar town, Ethiopia: application of a stress-process model with generalized structural equation modeling | common mental disorders before pregnancy and low birth weight                                                | Postnatal depression |

|                   |                                                                                                                                            |                                 |                           |
|-------------------|--------------------------------------------------------------------------------------------------------------------------------------------|---------------------------------|---------------------------|
| Czaderny 2020     | Risk factors for depression. New evidence on selenium deficiency and depressive disorders                                                  | dietary and non-dietary factors | depressive disorders      |
| Chen 2020         | Cataract and the increased risk of depression in general population: a 16-year nationwide population-based longitudinal study              | cataract                        | depression                |
| Chen 2020         | Mitochondria could be a potential key mediator linking the intestinal microbiota to depression                                             | gut microbiome                  | depression                |
| Cavazos-Rehg 2020 | Social and Economic Equity and Family Cohesion as Potential Protective Factors from Depression Among Adolescents Living with HIV in Uganda | social and economic equity      | depression                |
| Capuco 2020       | Vitamin D and Depression in Women: A Mini-review                                                                                           | vitamin D                       | depression                |
| Benjet 2020       | Exposure to Armed Conflict in Childhood vs Older Ages and Subsequent Onset of Major Depressive Disorder                                    | neighbourhood with beatings     | major depressive disorder |

|              |                                                                                                                                      |                                                           |                           |
|--------------|--------------------------------------------------------------------------------------------------------------------------------------|-----------------------------------------------------------|---------------------------|
| Ayano 2020   | Food insecurity and the risk of depression in people living with HIV/AIDS: a systematic review and meta-analysis                     | food insecurity                                           | depression                |
| An 2020      | Parasympathetic predominance is a risk factor for future depression: A prospective cohort study                                      | parasympathetic predominance                              | depression                |
| Almazan 2020 | Stroke, Epilepsy, and Antiepileptic Drugs as the Etiology of Major Depressive Disorder: A Case Report and Review                     | structural, electrophysiologic, and pharmacologic factors | post-stroke depression    |
| Zhong 2019   | Integration of GWAS and brain eQTL identifies FLOT1 as a risk gene for major depressive disorder                                     | risk gene                                                 | major depressive disorder |
| Zhang 2019   | Prenatal nicotine exposure induces depression-like behavior in adolescent female rats via modulating neurosteroid in the hippocampus | prenatal nicotine exposure                                | depression-like behaviour |
| Zeng 2019    | Co-expression network analysis revealed that the ATP5G1 gene is associated with major depressive disorder                            | ATP5G1 gene                                               | major depressive disorder |

|             |                                                                                                                                    |                                                                                                   |                       |
|-------------|------------------------------------------------------------------------------------------------------------------------------------|---------------------------------------------------------------------------------------------------|-----------------------|
| Ye 2019     | Setting-Specific and Symptom-Specific Association between Secondhand Smoke Exposure and Depressive Symptoms                        | secondhand smoke                                                                                  | depressive symptoms   |
| Xue 2019    | Analysis of Influencing Factors of Poststroke Depression: Is Higher Body Mass Index Always a Risk Factor of Poststroke Depression? | National Institute of Health Stroke Scale score, the frequency of stroke, sleep duration, and BMI | poststroke depression |
| Wen 2019    | The risk factors for depression in cancer patients undergoing chemotherapy: a systematic review                                    | social support, anxiety, perceived stress, and self-efficacy                                      | depression            |
| Wassef 2019 | Anaemia and depletion of iron stores as risk factors for postpartum depression: a literature review                                | Anaemia, iron-deficiency                                                                          | postpartum depression |
| Wang 2019   | Diversiform etiologies for poststroke depression                                                                                   | biological mechanism and social psychological mechanisms                                          | poststroke depression |
| Wang 2019   | The associations between screen time-based sedentary behavior and depression: a systematic review and meta-analysis                | screen time-based sedentary behavior                                                              | depression            |

|                |                                                                                                                                                                                              |                      |                           |
|----------------|----------------------------------------------------------------------------------------------------------------------------------------------------------------------------------------------|----------------------|---------------------------|
| Wang 2019      | Cross-sectional associations between long-term exposure to particulate matter and depression in China: The mediating effects of sunlight, physical activity, and neighborly reciprocity      | air pollution        | depression                |
| Wang 2019      | Association between negative life events and early adolescents' depression: The moderating effects of catechol-O-methyltransferase (COMT) gene val158met polymorphism and parenting behavior | negative life events | depression                |
| Volz 2019      | General self-efficacy as a driving factor of post-stroke depression: A longitudinal study                                                                                                    | self-efficacy        | post-stroke depression    |
| Tiburcio Sainz | The association between substance use and depressive symptomatology in nursing university students in Mexico                                                                                 | substance use        | depressive symptomatology |

|             |                                                                                                                                                                                                |                                     |                      |
|-------------|------------------------------------------------------------------------------------------------------------------------------------------------------------------------------------------------|-------------------------------------|----------------------|
| Tao 2019    | Chronic Food Antigen-specific IgG-mediated Hypersensitivity Reaction as A Risk Factor for Adolescent Depressive Disorder                                                                       | serum histamine                     | depressive disorders |
| Su 2019     | Inflammation associated with chronic heart failure leads to enhanced susceptibility to depression                                                                                              | chronic heart failure               | depression           |
| Stroud 2019 | The cortisol awakening response (CAR) interacts with acute interpersonal stress to prospectively predict depressive symptoms among early adolescent girls                                      | cortisol awakening response, stress | depressive symptoms  |
| Starr 2019  | Serotonergic multilocus genetic variation moderates the association between major interpersonal stress and adolescent depressive symptoms: Replication and candidate environment specification | stress                              | depression           |



|              |                                                                                                                                                                                    |                                 |                                  |
|--------------|------------------------------------------------------------------------------------------------------------------------------------------------------------------------------------|---------------------------------|----------------------------------|
| Saul 2019    | Polymorphism in the serotonin transporter gene polymorphisms ( 5-HTTLPR) modifies the association between significant life events and depression in people with multiple sclerosis | Significant life events         | multiple sclerosis<br>depression |
| Santero 2019 | Association between religiosity and depression varies with age and sex among adults in South America: Evidence from the CESCAS I study                                             | Religiosity                     | depression                       |
| Ruiz 2019    | Congruent relations between perceived neighbourhood social cohesion and depressive symptoms among older European adults: An East-West analysis                                     | social cohesion                 | depressive<br>symptoms           |
| Rhee 2019    | Longitudinal study of the relationship between lower urinary tract symptoms and depressive symptoms                                                                                | lower urinary tract<br>symptoms | depressive<br>symptoms           |

|               |                                                                                                                                           |                                                  |                                  |
|---------------|-------------------------------------------------------------------------------------------------------------------------------------------|--------------------------------------------------|----------------------------------|
| Ren 2019      | Associations of family relationships and negative life events with depressive symptoms among Chinese adolescents: A cross-sectional study | family relationships                             | depressive symptoms, life events |
| Raudsepp 2019 | Brief report: Problematic social media use and sleep disturbances are longitudinally associated with depressive symptoms in adolescents   | problematic social media use, sleep disturbances | depressive symptoms              |
| Ranjit 2019   | Predictive Association of Smoking with Depressive Symptoms: a Longitudinal Study of Adolescent Twins                                      | cigarette smoking                                | depressive symptoms              |
| Raffetti 2019 | Longitudinal association between tobacco use and the onset of depressive symptoms among Swedish adolescents: the Kupol cohort study       | cigarette smoking                                | depressive symptoms              |

|                   |                                                                                                                                     |                                                                                                                    |                     |
|-------------------|-------------------------------------------------------------------------------------------------------------------------------------|--------------------------------------------------------------------------------------------------------------------|---------------------|
| Pramod 2019       | Lifestyle and substance use-an important cause for treatment-resistant depression and major depressive disorders                    | lifestyle, substance use                                                                                           | depression          |
| Pereira-Lima 2019 | Residency Program Factors Associated With Depressive Symptoms in Internal Medicine Interns: A Prospective Cohort Study              | Poor faculty feedback and inpatient learning experience, long work hours, and high institutional research rankings | depressive symptoms |
| Peppard 2019      | Risk of depression in pregnant women with low-normal serum Vitamin B12                                                              | vitamin B12                                                                                                        | depression          |
| Ozgan 2019        | Evaluation of the relationship between sexual functions and depressive symptoms among pregnant patients during the second trimester | sexual function                                                                                                    | depressive symptoms |
| Miwata 2019       | Performance Status Is a Risk Factor for Depression before the Diagnosis of Lung Cancer Patients                                     | performance status                                                                                                 | depression          |

|                     |                                                                                                                                                       |                                                    |                           |
|---------------------|-------------------------------------------------------------------------------------------------------------------------------------------------------|----------------------------------------------------|---------------------------|
| Meng 2019           | Dysmenorrhea increased the risk of postpartum depression in Chinese Han parturients                                                                   | dysmenorrhea                                       | postpartum depression     |
| Mendes-Chiloff 2019 | Depressive symptoms among the elderly in Sao Paulo city, Brazil: prevalence and associated factors (SABE Study)                                       | health problems, dependence and family dysfunction | depressive symptoms       |
| McQuaid 2019        | Understanding the relation between early-life adversity and depression symptoms: The moderating role of sex and an interleukin-1 $\beta$ gene variant | early life adversity                               | depressive symptomatology |
| Malmir 2019         | Metabolically healthy status and BMI in relation to depression: A systematic review of observational studies                                          | health status, BMI                                 | depression                |
| Lu 2019             | Inflammation and Risk of Depression in HIV: Prospective Findings From the Multicenter AIDS Cohort Study                                               | immune activation                                  | depression                |

|             |                                                                                                                                                   |                               |                                       |
|-------------|---------------------------------------------------------------------------------------------------------------------------------------------------|-------------------------------|---------------------------------------|
| Liu 2019    | Mediating role of resilience in relationship between negative life events and depression among Chinese adolescents                                | negative life events          | depression                            |
| Lin 2019    | The association between functional dyspepsia and depression: a meta-analysis of observational studies                                             | functional dyspepsia          | depression                            |
| Libuda 2019 | Vitamin D and the Risk of Depression: A Causal Relationship? Findings from a Mendelian Randomization Study                                        | vitamin D                     | depressive symptoms, broad depression |
| Liang 2019  | Exploring causal pathways linking cerebral small vessel diseases burden to poststroke depressive symptoms with structural equation model analysis | cerebral small vessel disease | Poststroke depressive symptoms        |
| Li 2019     | Adhering to a vegetarian diet may create a greater risk of depressive symptoms in the elderly male Chinese population                             | vegetarian diet               | depressive symptoms                   |

|                |                                                                                                                  |                                                                              |                                   |
|----------------|------------------------------------------------------------------------------------------------------------------|------------------------------------------------------------------------------|-----------------------------------|
| Lee 2019       | Household food insecurity and breakfast skipping: Their association with depressive symptoms                     | low food security, breakfast skipping                                        | depressive symptoms               |
| Kong 2019      | The association of endocannabinoid receptor genes (CNR1 and CNR2) polymorphisms with depression: A meta-analysis | CNR1rs1049353 or AAT triplet repeat polymorphism, CNR2rs2501432 polymorphism | depression                        |
| Kim 2019       | Income Volatility and Depressive Symptoms among Elderly Koreans                                                  | income volatility                                                            | depressive symptoms               |
| Kheirouri 2019 | Dietary Inflammatory Potential and the Risk of Incident Depression in Adults: A Systematic Review                | dietary inflammatory potential                                               | depression                        |
| Khaled 2019    | Prevalence and potential determinants of subthreshold and major depression in the general population of Qatar    | migrant status, ethnicity                                                    | subthreshold and major depression |
| Hymas 2019     | Predicting postpartum depression among adolescent mothers: A systematic review of risk                           | prior depression, familial social support                                    | postpartum depression             |

|              |                                                                                                                          |                                                         |                           |
|--------------|--------------------------------------------------------------------------------------------------------------------------|---------------------------------------------------------|---------------------------|
| Humphreys    | DNA methylation of HPA-axis genes and the onset of major depressive disorder in adolescent girls: a prospective analysis | variation in the HPA axis at the level of the methylome | major depressive disorder |
| Hu 2019      | Sugar-sweetened beverages consumption and the risk of depression: A meta-analysis of observational studies               | sugar-sweetened beverages                               | depression                |
| Hessel 2019  | Acute exposure to violent neighborhood crime and depressive symptoms among older individuals in Colombia                 | violent crime exposure                                  | depressive symptoms       |
| Grases 2019  | Possible relation between consumption of different food groups and depression                                            | food groups                                             | depression                |
| Gao 2019     | Association between earthquake experience and depression 37 years after the Tangshan earthquake: a cross-sectional study | earthquake experience                                   | depression                |
| Friberg 2019 | Educational level and the risk of depression after prostate cancer                                                       | education level                                         | depression                |

|               |                                                                                                                    |                                                                                                                                                                                                                                                  |                       |
|---------------|--------------------------------------------------------------------------------------------------------------------|--------------------------------------------------------------------------------------------------------------------------------------------------------------------------------------------------------------------------------------------------|-----------------------|
| Easton 2019   | Child Sexual Abuse and Depression in Late Life for Men: A Population-Based, Longitudinal Analysis                  | childhood sexual abuse                                                                                                                                                                                                                           | depressive symptoms   |
| Duan 2019     | Association between serum retinoic acid levels and risk of post-stroke depression in patients with ischemic stroke | retinoic acid                                                                                                                                                                                                                                    | poststroke depression |
| Ding 2019     | Correlation between C3435T Locus of ABCB1 Gene and Poststroke Depression in China                                  | C3435T gene polymorphism                                                                                                                                                                                                                         | poststroke depression |
| de Paula 2019 | Preterm birth as a risk factor for postpartum depression: A systematic review and meta-analysis                    | preterm birth                                                                                                                                                                                                                                    | postpartum depression |
| de Lima 2019  | Factors related to depressive symptoms in older adult patients with type 2 Diabetes Mellitus                       | being female, being single, being illiterate, having poor overall health, using a walking aid, having higher body mass index, having a greater intensity of dizziness, exhibiting functional impairment, and having gait and cognition deficits. | depressive symptoms   |



|               |                                                                                                                                            |                                                          |                           |
|---------------|--------------------------------------------------------------------------------------------------------------------------------------------|----------------------------------------------------------|---------------------------|
| Carpena 2019  | Sociodemographic, behavioral, and health-related risk factors for depression among men and women in a southern Brazilian city              | socioeconomic disadvantages, physical inactivity, stress | major depressive episodes |
| Byrne 2019    | Sleep Disorders and Risk of Incident Depression: A Population Case-Control Study                                                           | sleep disorder                                           | depression                |
| Brown 2019    | Declining Skeletal Muscle Mitochondrial Function Associated With Increased Risk of Depression in Later Life                                | skeletal muscle mitochondrial function                   | depressive symptoms       |
| Bonful 2019   | Sociodemographic correlates of depressive symptoms: a cross-sectional analytic study among healthy urban Ghanaian women                    | age, education, employment status                        | depression                |
| Bolzetta 2019 | The Relationship between Dietary Vitamin K and Depressive Symptoms in Late Adulthood: A Cross-Sectional Analysis from a Large Cohort Study | vitamin K                                                | depressive symptoms       |

|                |                                                                                                                                               |                                                                                                                    |                                |
|----------------|-----------------------------------------------------------------------------------------------------------------------------------------------|--------------------------------------------------------------------------------------------------------------------|--------------------------------|
| Boldarine 2019 | High-fat diet intake induces depressive-like behavior in ovariectomized rats                                                                  | high-fat intake                                                                                                    | depression                     |
| Boing 2019     | Factors associated with depression symptoms in women after breast cancer                                                                      | Age, educational attainment, diagnosis of other diseases, type of surgery, lymphedema, self-esteem, and body image | depression symptoms            |
| Azizi 2019     | Depressive symptoms and associated factors among Iranian women at midlife: a community-based, cross-sectional study                           | Marital relationship dissatisfaction, vasomotor symptoms, housing insecurity, obesity, age                         | depressive symptoms            |
| Avinun 2019    | A polygenic score for body mass index is associated with depressive symptoms via early life stress: Evidence for gene-environment correlation | BMI polygenic scores                                                                                               | depressive symptoms            |
| Arafa 2019     | Gestational diabetes and risk of postpartum depressive symptoms: A meta-analysis of cohort studies                                            | gestational diabetes                                                                                               | Postpartum depressive symptoms |
| Albrecht 2019  | Risk of Depression after Traumatic Brain Injury in a Large National Sample                                                                    | History of neuropsychiatric disturbances, age, gender                                                              | depression                     |

|                  |                                                                                                                                                                                       |                                                                                           |                     |
|------------------|---------------------------------------------------------------------------------------------------------------------------------------------------------------------------------------|-------------------------------------------------------------------------------------------|---------------------|
| Zhang 2018       | Cross-sectional associations of objectively assessed neighbourhood attributes with depressive symptoms in older adults of an ultra-dense urban environment: the Hong Kong ALECS study | destinations and social networks, public transport density and associated traffic volumes | depressive symptoms |
| Zetterstrom 2018 | Online sexual victimization in youth: predictors and cross-sectional associations with depressive symptoms                                                                            | Online unwanted sexual solicitation victimization                                         | depressive symptoms |
| Yamamoto 2018    | Perceived Neighborhood Conditions and Depression: Positive Local News as a Buffering Factor                                                                                           | neighbourhood conditions                                                                  | depression          |
| Xuan 2018        | Type 2 diabetes is causally associated with depression: a Mendelian randomization analysis                                                                                            | type 2 diabetes                                                                           | depression          |
| Xu 2018          | Exploration of the association between dietary fiber intake and depressive symptoms in adults                                                                                         | dietary fiber intake                                                                      | depressive symptoms |

|               |                                                                                                                             |                                                                   |                     |
|---------------|-----------------------------------------------------------------------------------------------------------------------------|-------------------------------------------------------------------|---------------------|
| Wu 2018       | Child maltreatment and adult depressive symptoms: Roles of self-compassion and gratitude                                    | Psychological maltreatment, neglect, sexual abuse, physical abuse | depressive symptoms |
| Wilson 2018   | Hysterectomy and incidence of depressive symptoms in midlife women: the Australian Longitudinal Study on Women's Health     | hysterectomy                                                      | depressive symptoms |
| Williams 2018 | The relationship between caregiver burden and depressive symptoms in Ontario home care clients                              | caregiver burden                                                  | depressive symptoms |
| Werneck 2018  | Associations between TV viewing and depressive symptoms among 60,202 Brazilian adults: The Brazilian national health survey | TV viewing                                                        | depression          |
| Wang 2018     | The Relationship between Air Pollution and Depression in China: Is Neighbourhood Social Capital Protective?                 | air pollution                                                     | depressive symptoms |

|                  |                                                                                                                                                    |                              |                           |
|------------------|----------------------------------------------------------------------------------------------------------------------------------------------------|------------------------------|---------------------------|
| Virtanen 2018    | Long working hours and depressive symptoms: systematic review and meta-analysis of published studies and unpublished individual participant data   | working hours                | depressive symptoms       |
| Vancampfort 2018 | Sedentary behavior and depressive symptoms among 67,077 adolescents aged 12-15 years from 30 low- and middle-income countries                      | sedentary behaviour          | depressive symptoms       |
| Sainsbury 2018   | The relationship between gluten free diet adherence and depressive symptoms in adults with coeliac disease: A systematic review with meta-analysis | gluten free diet             | depressive symptoms       |
| Rui 2018         | Meta-analysis on the Association Between Norepinephrine Transporter Gene rs2242446, rs5569 Polymorphisms and Risk of Major Depressive Disorder     | NET gene rs5569 polymorphism | major depressive disorder |

|                         |                                                                                                                                                                                   |                                                                                    |                                |
|-------------------------|-----------------------------------------------------------------------------------------------------------------------------------------------------------------------------------|------------------------------------------------------------------------------------|--------------------------------|
| Ren 2018                | Is social support a cause or consequence of depression? A longitudinal study of adolescents                                                                                       | social support                                                                     | depression                     |
| Poole 2018              | Major depressive disorder prevalence and risk factors among Syrian asylum seekers in Greece                                                                                       | gender, children, time in asylum                                                   | major depressive disorder      |
| Pittampalli 2018        | Does Vitamin D deficiency cause depression?                                                                                                                                       | vitamin D                                                                          | depression                     |
| Park 2018               | Association of depression with socioeconomic status, anticardiolipin antibodies, and organ damage in patients with systemic lupus erythematosus: results from the KORNET registry | current smoking status, CL-status, and SLICC damage index score, education, income | depression                     |
| Nathanson 2018          | Antenatal diet and postpartum depressive symptoms: A prospective study                                                                                                            | antenatal diet                                                                     | depressive symptoms postpartum |
| Mossakowska-Wójcik 2018 | The importance of TCF4 gene in the etiology of recurrent depressive disorders                                                                                                     | TCF4 gene                                                                          | recurrent depressive disorder  |

|              |                                                                                                                                                          |                                                          |                           |
|--------------|----------------------------------------------------------------------------------------------------------------------------------------------------------|----------------------------------------------------------|---------------------------|
| Miki 2018    | Longitudinal adherence to a dietary pattern and risk of depressive symptoms: the Furukawa Nutrition and Health Study                                     | diet pattern                                             | depressive symptoms       |
| Mahenge 2018 | Adverse childhood experiences and intimate partner violence during pregnancy and their association to postpartum depression                              | Adverse childhood experiences, intimate partner violence | postpartum depression     |
| Luo 2018     | Education as a moderator in the effect of diabetes on depressive symptoms in Chinese middle-aged and older adults: A population-based longitudinal study | diabetes                                                 | depressive symptoms       |
| Liu 2018     | Antepartum urinary tract infection and postpartum depression in Taiwan - a nationwide population-based study                                             | urinary tract infection                                  | postpartum depression     |
| Liu 2018     | The metabolic factor kynurenic acid of kynurenine pathway predicts major depressive disorder                                                             | kynurenine pathway factors                               | major depressive disorder |

|                    |                                                                                                                                                                          |                        |                      |
|--------------------|--------------------------------------------------------------------------------------------------------------------------------------------------------------------------|------------------------|----------------------|
| Leonard 2018       | Inflammation and depression: a causal or coincidental link to the pathophysiology?                                                                                       | inflammation           | depression           |
| Lam 2018           | Genotype-dependent associations between serotonin transporter gene (SLC6A4) DNA methylation and late-life depression                                                     | SLC6A4 methylation     | late-life depression |
| Lahav-Kadmiel 2018 | Bullying victimization and depressive symptoms in adolescence: The moderating role of parent-child conflicts among boys and girls                                        | bullying victimization | depressive symptoms  |
| Kalmbach 2018      | Nocturnal insomnia symptoms and stress-induced cognitive intrusions in risk for depression: A 2-year prospective study                                                   | insomnia               | depression           |
| Jorgensen 2018     | Higher dietary inflammation is associated with increased odds of depression independent of Framingham Risk Score in the National Health and Nutrition Examination Survey | proinflammatory diet   | depressive symptoms  |



|               |                                                                                                                                                                        |                              |                     |
|---------------|------------------------------------------------------------------------------------------------------------------------------------------------------------------------|------------------------------|---------------------|
| Iliadis 2018  | Women with prolonged nausea in pregnancy have increased risk for depressive symptoms postpartum                                                                        | prolonged nausea             | depressive symptoms |
| Huang 2018    | Dose-Response Relationships between Second-Hand Smoke Exposure and Depressive Symptoms among Adolescents in Guangzhou, China                                           | second-hand smoke            | depressive symptoms |
| Hosseini 2018 | The Prevalence of Anemia and its Association with Depressive Symptoms among Older Adults in North of Iran                                                              | anemia                       | depressive symptoms |
| Hamano 2018   | Is familial risk for depression confounded by individual and familial socioeconomic factors and neighborhood environmental factors? A 7-year follow-up study in Sweden | family history of depression | depression          |
| Hajek 2018    | Impact of falls on depressive symptoms among the oldest old: Results from the AgeQualiDe study                                                                         | falls                        | depressive symptoms |

|                      |                                                                                                                            |                                                |                     |
|----------------------|----------------------------------------------------------------------------------------------------------------------------|------------------------------------------------|---------------------|
| Guintivano 2018      | Predictors of Postpartum Depression: A Comprehensive Review of the Last Decade of Evidence                                 | psychiatric history, adverse life events       | depression          |
| Greenwood 2018       | Insulin resistance is associated with depression risk in polycystic ovary syndrome                                         | insulin resistance                             | depression          |
| Graham               | The association between diabetes and depressive symptoms varies by quality of diabetes care across Europe                  | diabetes                                       | depressive symptoms |
| Gershon 2018         | Victimization and traumatic stress: Pathways to depressive symptoms among low-income, African-American girls               | victimization and traumatic stressors          | depressive symptoms |
| Gayman 2018          | Risk and Protective Factors for Depressive Symptoms Among African American Men: An Application of the Stress Process Model | stress process variables, neighbourhood income | depressive symptoms |
| Garcia-Esquinas 2018 | Moderate alcohol drinking is not associated with risk of depression in older adults                                        | alcohol consumption                            | depression          |

|              |                                                                                                                                 |                                                                                                                                    |                       |
|--------------|---------------------------------------------------------------------------------------------------------------------------------|------------------------------------------------------------------------------------------------------------------------------------|-----------------------|
| Flores 2018  | The Association Between Past Sexual Abuse and Depression in Older Adults From Colombia                                          | sexual abuse, history of being displaced by violence, socioeconomic status, education, self-rated health status, self-rated memory | depression            |
| Fan 2018     | Risk of depressive disorder among patients with head and neck cancer: A nationwide population-based study                       | head and neck cancer                                                                                                               | depressive disorder   |
| Dayan 2018   | The Relationship between Gestational Weight Gain and Postpartum Depression in Normal and Overweight Pregnant Women              | gestational weight gain                                                                                                            | postpartum depression |
| Czarny 2018  | Single-nucleotide polymorphisms of uracil-processing genes affect the occurrence and the onset of recurrent depressive disorder | SNPs localized in the uracil-processing genes                                                                                      | depression            |
| Clevesy 2018 | Is There a Relationship Between Gestational Diabetes and Perinatal Depression?                                                  | gestational diabetes mellitus                                                                                                      | perinatal depression  |

|               |                                                                                                                                                                                                      |                                                   |                       |
|---------------|------------------------------------------------------------------------------------------------------------------------------------------------------------------------------------------------------|---------------------------------------------------|-----------------------|
| Cheng 2018    | Combination of High-Sensitivity C-Reactive Protein and Homocysteine Predicts the Post-Stroke Depression in Patients with Ischemic Stroke                                                             | high-sensitivity C-reactive protein, homocysteine | poststroke depression |
| Chen 2018     | The association between glaucoma and risk of depression: a nationwide population-based cohort study                                                                                                  | glaucoma                                          | depression            |
| Chen 2018     | The association between neutrophil-to-lymphocyte ratio and post-stroke depression                                                                                                                    | neutrophil-to-lymphocyte ratio                    | poststroke depression |
| Cattaneo 2018 | FoxO1, A2M, and TGF- $\beta$ 1: three novel genes predicting depression in gene X environment interactions are identified using cross-species and cross-tissues transcriptomic and miRNomic analyses | early life emotional stress                       | depression            |
| Bertoni 2018  | Depressive symptoms and muscle weakness: A two-way relation?                                                                                                                                         | dynapenia                                         | depressive symptoms   |

|             |                                                                                                                                                     |                                 |                           |
|-------------|-----------------------------------------------------------------------------------------------------------------------------------------------------|---------------------------------|---------------------------|
| Ayalon 2018 | Perceived Age Discrimination: A Precipitator or a Consequence of Depressive Symptoms?                                                               | age discrimination              | depressive symptoms       |
| Yang 2017   | Lucky gene 5-HTTLPR and postpartum depression: A systematic review                                                                                  | 5-HTTLPR polymorphism           | postpartum depression     |
| Xu 2017     | Cesarean section and risk of postpartum depression: A meta-analysis                                                                                 | cesarian section                | postpartum depression     |
| Xu 2017     | The interaction of miR-34b/c polymorphisms and negative life events increases susceptibility to major depressive disorder in Han Chinese population | miR-34b/c, negative life events | major depressive disorder |
| Wirth 2017  | The Dietary Inflammatory Index, shift work, and depression: Results from NHANES                                                                     | dietary inflammation            | depressive symptoms       |
| Varela 2017 | Association between gestational diabetes and perinatal depressive symptoms: evidence from a Greek cohort study                                      | gestational diabetes mellitus   | depressive symptoms       |

|              |                                                                                                                                                                         |                                                |                      |
|--------------|-------------------------------------------------------------------------------------------------------------------------------------------------------------------------|------------------------------------------------|----------------------|
| Uddin 2017   | Adolescent depression linked to socioeconomic status? Molecular approaches for revealing premorbid risk factors                                                         | SES, changes in 5mC, changes in brain function | depression           |
| Shin 2017    | Association of TNF-alpha G-308A gene polymorphism with depression: A meta-analysis                                                                                      | TNF- $\alpha$ G-308A polymorphism              | depression           |
| Sarubin 2017 | The sex-dependent role of the glucocorticoid receptor in depression: variations in the NR3C1 gene are associated with major depressive disorder in women but not in men | GR-related genes                               | depression           |
| Recto 2017   | Psychosocial Risk Factors for Perinatal Depression among Female Adolescents: A Systematic Review                                                                        | psychosocial risk factors                      | perinatal depression |
| Ortiz 2017   | Determinants associated with chronic and incident depression in Mexican older adults                                                                                    | poverty, loneliness                            | depression           |

|               |                                                                                                                                                                     |                                                                                       |                                |
|---------------|---------------------------------------------------------------------------------------------------------------------------------------------------------------------|---------------------------------------------------------------------------------------|--------------------------------|
| Ojagbemi 2017 | Depression after Stroke in Sub-Saharan Africa: A Systematic Review and Meta-Analysis                                                                                | education, cognitive impairment, physical disability, quality of life, marital status | poststroke depression          |
| Neumann 2017  | Recollections of Emotional Abuse and Neglect in Childhood as Risk Factors for Depressive Disorders and the Need for Psychotherapy in Adult Life                     | emotional abuse, neglect, attachment anxiety                                          | depression                     |
| Nelson 2017   | Childhood maltreatment and characteristics of adult depression: meta-analysis                                                                                       | Childhood maltreatment, especially emotional abuse and neglect                        | treatment-resistant depression |
| Nam 2017      | The synergistic effect of breastfeeding discontinuation and cesarean section delivery on postpartum depression: A nationwide population-based cohort study in Korea | Breastfeeding discontinuation and cesarean section delivery                           | postpartum depression          |
| Najman 2017   | Maternal depression and family adversity: Linked pathways to offspring depression?                                                                                  | adverse life events, maternal depression                                              | depression                     |

|               |                                                                                                                                              |                                                                                                                             |                                 |
|---------------|----------------------------------------------------------------------------------------------------------------------------------------------|-----------------------------------------------------------------------------------------------------------------------------|---------------------------------|
| Modalsli 2017 | The association between the clinical diversity of psoriasis and depressive symptoms: the HUNT Study, Norway                                  | psoriasis                                                                                                                   | depression                      |
| Meng 2017     | Predictors of early-onset post-ischemic stroke depression: a cross-sectional study                                                           | NIHSS, HAMD scores, dopamine level, 5-hydroxytryptamine level, tumor necrosis factor-alpha level, nerve growth factor level | post-ischemic stroke depression |
| Markkula 2017 | Predictors of new-onset depressive disorders - Results from the longitudinal Finnish Health 2011 Study                                       | depressive symptoms, anxiety disorders, trust, childhood adversities                                                        | depressive disorders            |
| Madsen 2017   | Job strain as a risk factor for clinical depression: systematic review and meta-analysis with additional individual participant data         | job strain                                                                                                                  | clinical depression             |
| Ma 2017       | GNB3 and CREB1 gene polymorphisms combined with negative life events increase susceptibility to major depression in a Chinese Han population | alleles                                                                                                                     | major depression                |



|            |                                                                                                                   |                                                                                                   |                           |
|------------|-------------------------------------------------------------------------------------------------------------------|---------------------------------------------------------------------------------------------------|---------------------------|
| Liu 2017   | Social defeat stress causes depression-like behavior with metabolite changes in the prefrontal cortex of rats     | social defeat                                                                                     | depression-like behaviour |
| Liu 2017   | Risk factors for postpartum depression among Chinese women: path model analysis                                   | mobile phone use, maternal age, gestational hypertensive disorder, mode of feeding, infant weight | postpartum depression     |
| Liu 2017   | The YWHAE gene confers risk to major depressive disorder in the male group of Chinese Han population              | risk gene                                                                                         | major depressive disorder |
| Li 2017    | Dietary zinc and iron intake and risk of depression: A meta-analysis                                              | dietary zinc and iron                                                                             | depression                |
| Li 2017    | Dietary patterns and depression risk: A meta-analysis                                                             | dietary pattern                                                                                   | depression                |
| Li 2017    | Maternal history of child maltreatment and maternal depression risk in the perinatal period: A longitudinal study | maternal history of child physical and emotional neglect                                          | perinatal depression      |
| Leung 2017 | Predictors of Postpartum Depression in Partnered Mothers and Fathers from a Longitudinal Cohort                   | household income, prenatal depressive symptoms, social support stressful life events, smoking     | postpartum depression     |

|                 |                                                                                                                       |                                                                                                      |                     |
|-----------------|-----------------------------------------------------------------------------------------------------------------------|------------------------------------------------------------------------------------------------------|---------------------|
| Lee 2017        | Gender differences in the trajectories and the risk factors of depressive symptoms in later life                      | physical health status, employment, social participation                                             | depressive symptoms |
| Lee 2017        | Depression and Its Associated Factors Among Rural Diabetic Residents                                                  | gender, level of education, family support, physical activity, diabetic diet, activity levels, sleep | depression          |
| Lac 2017        | Association between religious practice and risk of depression in older people in the subacute setting                 | intrinsic religiosity, cognition                                                                     | depression scores   |
| Koukounari 2017 | Pathways from maternal depression to young adult offspring depression: an exploratory longitudinal mediation analysis | maternal depression                                                                                  | depression          |
| Kang 2017       | Relationship between interleukin-1beta and depressive disorder after acute coronary syndrome                          | interleukin-1beta                                                                                    | depressive disorder |
| Joshi 2017      | Pathways from neighborhood poverty to depression among older adults                                                   | neighbourhood poverty (and homicide)                                                                 | depression          |

|              |                                                                                                                                                                      |                                                                                                     |                                |
|--------------|----------------------------------------------------------------------------------------------------------------------------------------------------------------------|-----------------------------------------------------------------------------------------------------|--------------------------------|
| James 2017   | Built Environment and Depression in Low-Income African Americans and Whites                                                                                          | built environment                                                                                   | depression                     |
| Ihongbe 2017 | Do Successive Preterm Births Increase the Risk of Postpartum Depressive Symptoms?                                                                                    | preterm birth                                                                                       | Postpartum depressive symptoms |
| Han 2017     | Interactions between the vascular endothelial growth factor gene polymorphism and life events in susceptibility to major depressive disorder in a Chinese population | interactions between the VEGF rs2010963 polymorphism and environment                                | major depressive disorder      |
| Ha 2017      | Can Obesity Cause Depression? A Pseudo-panel Analysis                                                                                                                | BMI                                                                                                 | depression                     |
| Groger 2017  | Causes of Depression in Sarcoidosis                                                                                                                                  | inflammation<br>mediators, fatigue,<br>burdensome and<br>chronic course of<br>sarcoidosis, steroids | depression                     |
| Gorlova 2017 | Dynamics of the Development of Depressive-Like State in Rats Stressed by Chronic Exposure of Ultrasound of Variable Frequency                                        | ultrasound                                                                                          | depressive-like state          |

|                  |                                                                                                                                                                                                 |                                              |                          |
|------------------|-------------------------------------------------------------------------------------------------------------------------------------------------------------------------------------------------|----------------------------------------------|--------------------------|
| Gardiner 2017    | Huntingtin gene repeat size variations affect risk of lifetime depression                                                                                                                       | polymorphism                                 | depression               |
| Dean 2017        | The neurobiology of depression: An integrated view                                                                                                                                              | neurotransmission, HPA axis abnormalities    | depression               |
| Cross-Denny 2017 | Using the Social Determinants of Health as a Framework to Examine and Address Predictors of Depression in Later Life                                                                            | health, social support                       | depression in later life |
| Cabello 2017     | The role of unhealthy lifestyles in the incidence and persistence of depression: a longitudinal general population study in four emerging countries                                             | smoking, physical activity, alcohol drinking | depression               |
| Bhandari 2017    | Association of Inflammatory Bowel Disease (IBD) with Depressive Symptoms in the United States Population and Independent Predictors of Depressive Symptoms in an IBD Population: A NHANES Study | IBD, age, marital status                     | depressive symptoms      |

|                      |                                                                                                               |                                                                                   |                                |
|----------------------|---------------------------------------------------------------------------------------------------------------|-----------------------------------------------------------------------------------|--------------------------------|
| Beshai 2017          | Minding the gap: Subjective relative deprivation and depressive symptoms                                      | subjective relative deprivation                                                   | depression symptoms            |
| Babkair 2017         | Risk Factors for Poststroke Depression: An Integrative Review                                                 | stroke severity, cognitive impairment, physical disability, functional dependency | poststroke depression          |
| Angerer 2017         | Night Work and the Risk of Depression                                                                         | nighttime shift work                                                              | depression                     |
| Andreeva 2017        | Dyslipidemia as a Potential Moderator of the Association between Hearing Loss and Depressive Symptoms         | hearing/hearing loss                                                              | depressive symptoms            |
| Amutah-Onukagha 2017 | An Examination of the Sociodemographic and Health Determinants of Major Depressive Disorder Among Black Women | poverty, smoking status                                                           | major depressive disorder      |
| Almquist 2017        | Associations between social support and depressive symptoms: social causation or social selection-or both?    | social support                                                                    | depressive symptoms            |
| Alhasanat 2017       | Risk For Postpartum Depression Among Immigrant Arabic Women in the United States: A Feasibility Study         | social support, maternity blues                                                   | postpartum depressive symptoms |

|                |                                                                                                                                                      |                                         |                           |
|----------------|------------------------------------------------------------------------------------------------------------------------------------------------------|-----------------------------------------|---------------------------|
| Adjibade 2017  | The Inflammatory Potential of the Diet Is Associated with Depressive Symptoms in Different Subgroups of the General Population                       | inflammatory potential of diet, smoking | depressive symptoms       |
| Tang 2020      | Impaired ATP Release from Brain Astrocytes May be a Cause of Major Depression                                                                        | stress, ATP                             | major depressive disorder |
| Cernadas 2020  | Postpartum depression: Risks and early detection                                                                                                     | mood factors                            | postpartum depression     |
| Lee 2018       | Assessing the relative contribution of social exclusion, income-poverty, and financial strain on depressive symptoms among older people in Hong Kong | social exclusion, financial strain      | depressive symptoms       |
| Weissman 2018  | Risks for Major Depression: Searching for Stable Traits                                                                                              | cortical thinning                       | depressive illness        |
| Vallerand 2018 | Risk of depression among patients with acne in the U.K.: a population-based cohort study                                                             | acne                                    | depression                |

|             |                                                                      |                                                                                                                                                                                                     |                           |
|-------------|----------------------------------------------------------------------|-----------------------------------------------------------------------------------------------------------------------------------------------------------------------------------------------------|---------------------------|
| Reding 2017 | Perimenopausal depression and early menopause: cause or consequence? | premenopausal depression, past antidepressant use, stressful life events, vasomotor symptoms, weight, smoking status, ethnicity, education, estradiol secretion, reproductive lifespan and estrogen | perimenopausal depression |
|-------------|----------------------------------------------------------------------|-----------------------------------------------------------------------------------------------------------------------------------------------------------------------------------------------------|---------------------------|

---
