# Supplementary figures and images for: Biological, Psychological, and Social Determinants of Depression: A Review of Recent Literature
Source: MDPI journal article supplement (doi:10.3390/brainsci11121633), 2021-12-10

## Conceptual Framework: Determinants of Depression

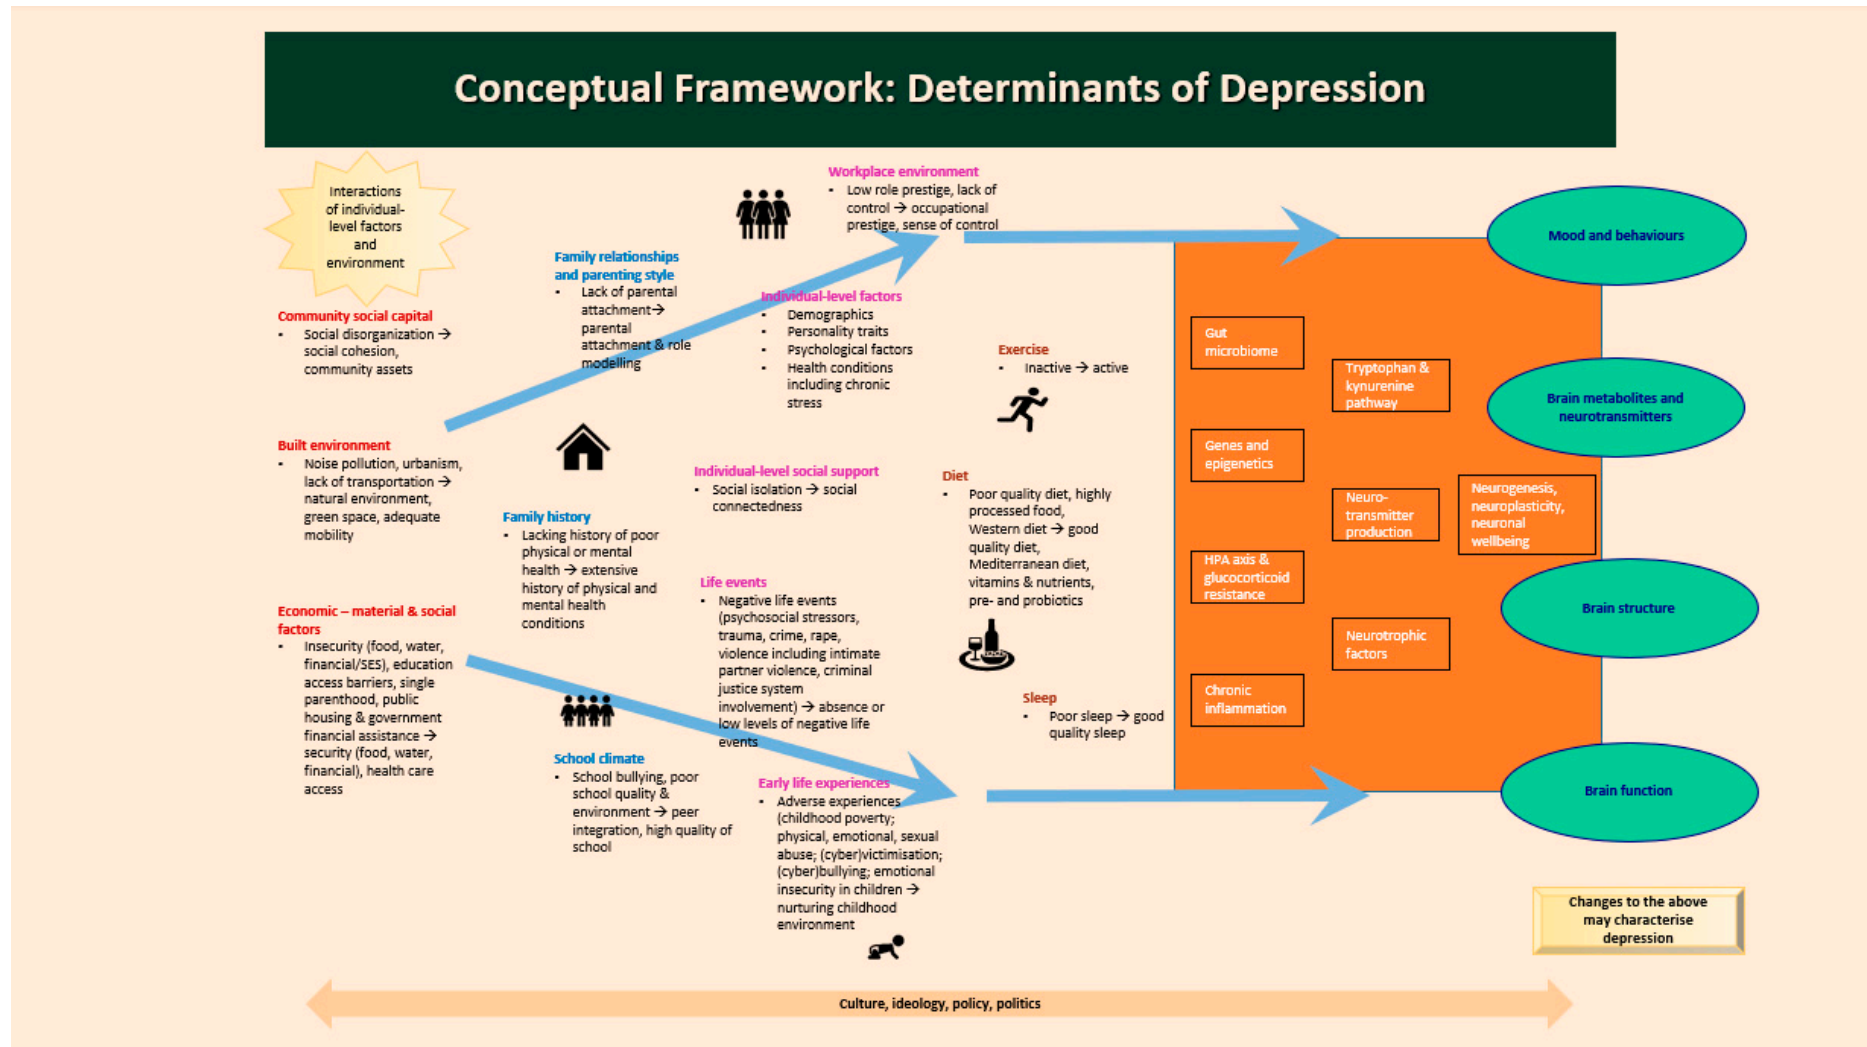

Figure S1. Determinants of depression

Supplement: s1 [file s1]
